# Supplementary material for: Water-soluble binuclear aquo Cu( ii ) complex with an amide ligand as an electrocatalyst for the OER, HER and CO 2 RR
Source: Royal Society of Chemistry journal article supplement (doi:10.1039/d5ra07824e), 2025-01-01
Supplement: d5ra07824e1.pdf [file d5ra07824e1.pdf]

## Supplementary Information

### Water soluble binuclear aquo Cu(II) complex with amide ligand as electrocatalyst for OER, HER and CO<sub>2</sub>RR activity

Md. Adnan Khan,<sup>a</sup> Sonal Shruti,<sup>a</sup> Swaraj Sengupta,<sup>b</sup> Sahanwaj Khan,<sup>a</sup> Prabhakar Bhardwaj,<sup>c</sup> Pankaj Kumar,<sup>c</sup> Subhendu Naskar<sup>a\*</sup>

<sup>a</sup> Department of Chemistry, Birla Institute of Technology-Mesra, Ranchi, India

<sup>b</sup> Department of Chemical Engineering, Birla Institute of Technology-Mesra, Ranchi, India

<sup>c</sup> Department of Chemistry, Indian Institute of Science Education and Research, Tirupati, India

#### Table of contents

|                                                                                                                                                                                                                                                                                                                                                                               | Pg. No. |
|-------------------------------------------------------------------------------------------------------------------------------------------------------------------------------------------------------------------------------------------------------------------------------------------------------------------------------------------------------------------------------|---------|
| <b>Scheme 1</b> - Synthetic procedure for preparation of Ligand and Cu-complex ( <b>1</b> ) .                                                                                                                                                                                                                                                                                 | 2       |
| Figure S1 and 2- Mass of Ligand <b>L</b> and complex <b>1</b>                                                                                                                                                                                                                                                                                                                 | 3       |
| Figure S3- NMR spectrum of <b>L</b> in CDCl <sub>3</sub>                                                                                                                                                                                                                                                                                                                      | 4-5     |
| Crystallographic Information with selective bond length and angles of <b>L</b> and <b>1</b>                                                                                                                                                                                                                                                                                   | 5-8     |
| Figure S 4-6- UV Vis Spectra                                                                                                                                                                                                                                                                                                                                                  | 8-9     |
| Figure S7-8- GC trace for H <sub>2</sub> and O <sub>2</sub>                                                                                                                                                                                                                                                                                                                   | 10      |
| Figure S9- 100 cycles of consecutive CV at pH 13.5 for complex <b>1</b> and CV of rinsed working electrode (glassy carbon) in pH 13.5 buffer                                                                                                                                                                                                                                  | 11-12   |
| Figure S11 (a)- Mass spectrum of Complex <b>1</b> after 2 hours of CPE at +1.45 V, (b)- Mass spectrum of 0.5 mM concentration Complex <b>1</b> after 2 hours of CPE at -1.6 V with 56 eq. Perchloric acid. (c) Mass spectrum of 0.5 mM concentration Complex <b>1</b> after 4.5 hours of CPE at -2.15 V with 8 eq. Perchloric acid and purging CO <sub>2</sub> for 60 minutes | 13-14   |
| Figure S12(a)- Total charge accumulated after 2 hours of CPE of complex <b>1</b> at - 1.6 V vs Ag/AgCl.                                                                                                                                                                                                                                                                       | 15      |
| Figure S12(b)- Total charge accumulated after 2 hours of CPE of complex <b>1</b> at +1.45 V vs Ag/AgCl.                                                                                                                                                                                                                                                                       | 16      |
| Figure S13- (A) CV of Complex <b>1</b> in phosphate buffer solution at pH 13.5 before and after CPE (B) CV of <b>1</b> before and after CPE with 0.5 mM conc. at -1.6 V vs Ag/AgCl (C) CV of <b>1</b> before and after CPE with 0.5 mM conc. at -2.15 V vs Ag/AgCl for 4.5 hours.                                                                                             | 16      |
| Figure S14- CV of cathodic segment <b>1</b> in water, c = 0.5 mM, Scan rate =100 mV/s, internal reference Ag/AgCl (Aqueous), Working electrode-glassy Carbon in different acids.                                                                                                                                                                                              | 17      |
| Figure S15- CV of complex <b>1</b> with concentration 0.1 mM to 0.5 mM in pH 13.5 phosphate buffer solution with scan rate of 100 mV/s and glassy carbon working electrode.                                                                                                                                                                                                   | 17      |
| Figure S16- Copper based proton reducing and water oxidizing catalysts                                                                                                                                                                                                                                                                                                        | 17-19   |
| Figure S 17- (a) Molecular mechanics charges (MM) (b) Electrostatic Potential Charges (ESP) on respective atoms for complex <b>1</b> .                                                                                                                                                                                                                                        | 19      |
| Figure S 18- UV-Visible spectra of <b>1</b> before and after 270 minutes of CPE at 2.15 V vs NHE after purging CO <sub>2</sub> for 60 minutes with 8 eq of perchloric acid and 0.5 mM of <b>1</b>                                                                                                                                                                             | 20      |
| Figure S 19- 270 minutes of CPE of <b>1</b> after purging CO <sub>2</sub> for 60 minutes with 8 eq of perchloric acid and 0.5 mM of <b>1</b> at 2.15 V vs NHE and CPE of blank solution with purging CO <sub>2</sub> for 60 minutes with 8 eq of perchloric acid at 2.15 V vs NHE.                                                                                            | 20      |
| Figure S20- GC trace after CPE for 270 minutes of CPE at -2.15 V with CO <sub>2</sub> and H <sup>+</sup> .                                                                                                                                                                                                                                                                    | 20-21   |
| HPLC plots and calculations                                                                                                                                                                                                                                                                                                                                                   | 22-27   |
| Calculation of % Selectivity of <b>1</b>                                                                                                                                                                                                                                                                                                                                      | 29      |
| Reference                                                                                                                                                                                                                                                                                                                                                                     | 30      |
| Cartesian Coordinate for Complex <b>1</b>                                                                                                                                                                                                                                                                                                                                     | 30-34   |

## Synthesis and Structural analysis

Pyridine-3,4-dicarboxylic acid (3 mmol, 501.36 mg) was refluxed with 7 ml of Thionyl chloride at 80°C for 6 hours under inert atmosphere. Grey solid compound was separated from Thionyl chloride using short path distillation. In the next step 2-(Aminomethyl) pyridine (3mmol, 282.33 mg) was added to an R.B with (4.5 mmol, 454.95 mg) Triethylamine, 15 ml of dry DCM and stirred for 20 minutes. Later the chlorinated compound was added to the R.B under inert atmosphere and refluxed at 40°C for 8 hours. Dark brown crystalline ligand was filtered and dried in *vacuo*.<sup>1-2</sup> 1mmol (257 mg) of the ligand was dissolved in methanol with 1.5 mmol of Et<sub>3</sub>N (1mmol, 151.65 mg) afterwards (370.53 mg) of copper perchlorate hexahydrate was added in the solution. Green precipitate was observed suddenly. The reaction mixture was refluxed for 2 hours at 50°C. Green solid crystalline complex was filtered and washed with methanol and dissolved in water for all the analysis. NMR of the **L** was done on dissolution in CDCl<sub>3</sub> (Figure-S4). The exact mass of the ligand was calculated to be 257.08. Whereas the (+ESI-MS) observed on the Mass spectroscopy of ligand (**L1**) and **1** are 258.27 (Figure S1). A binuclear complex was also observed on the mass spectra showing an +ESI mass of 673.39 (Figure S3) in mass grade H<sub>2</sub>O.

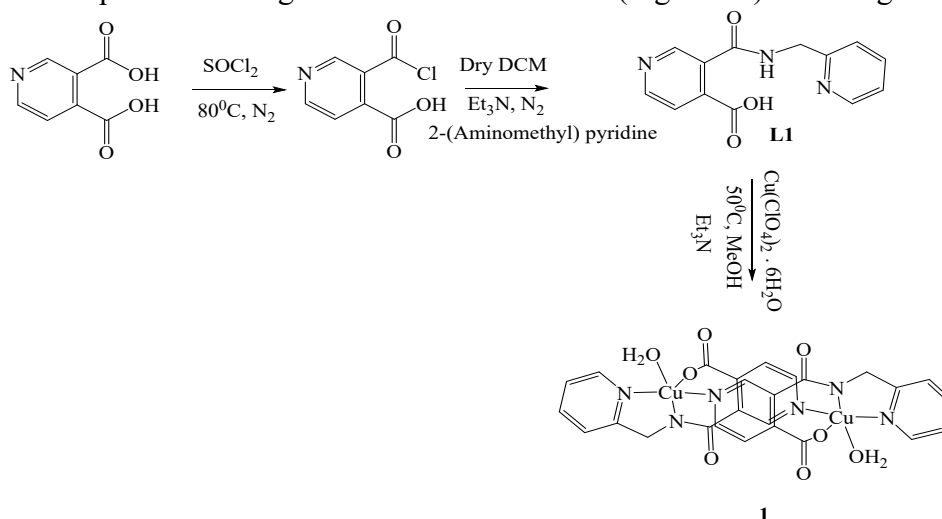

**Scheme 1-** Synthetic procedure for preparation of Ligand **L1** and Cu-complex (**1**) .

T: ITMS + c ESI Full ms [200.00-700.00]

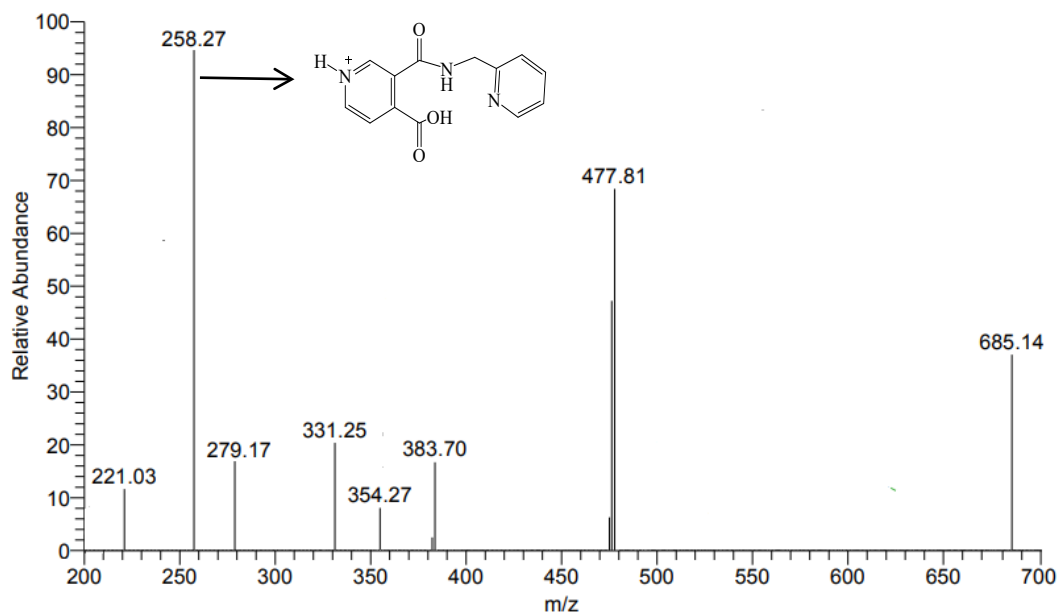

Figure S1- Mass spectrum of ligand.

1\_220509171726 #289 RT: 0.62 AV: 1 NL: 1.50E6  
T: ITMS + c ESI Full ms [200.00-1000.00]

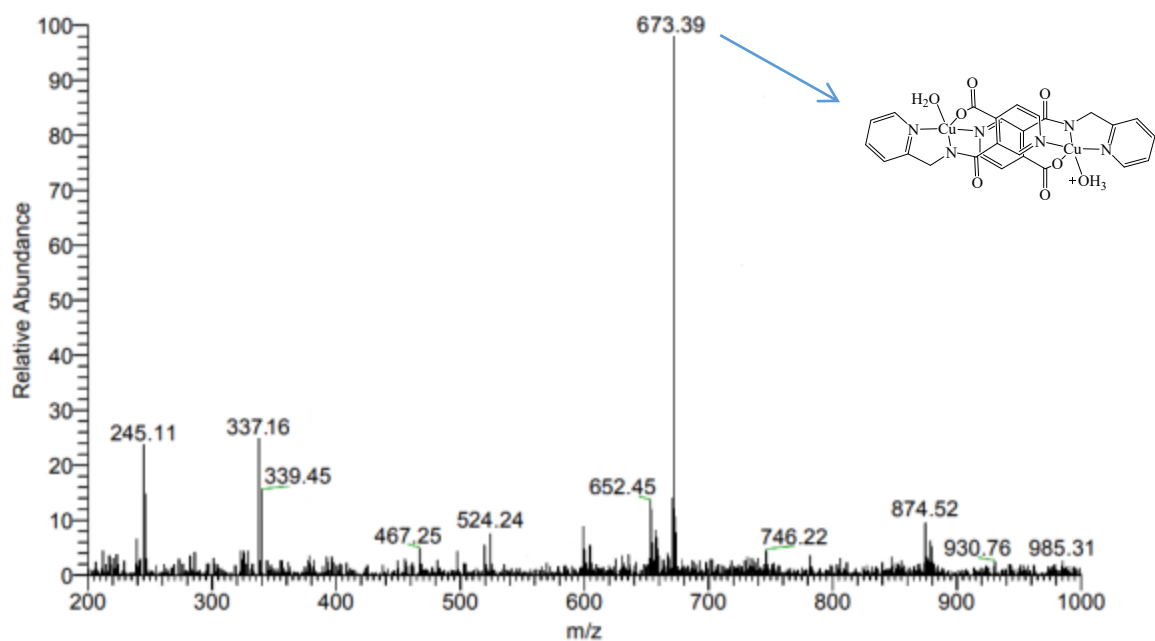

Figure S2- Mass of complex 1 recorded in Water .

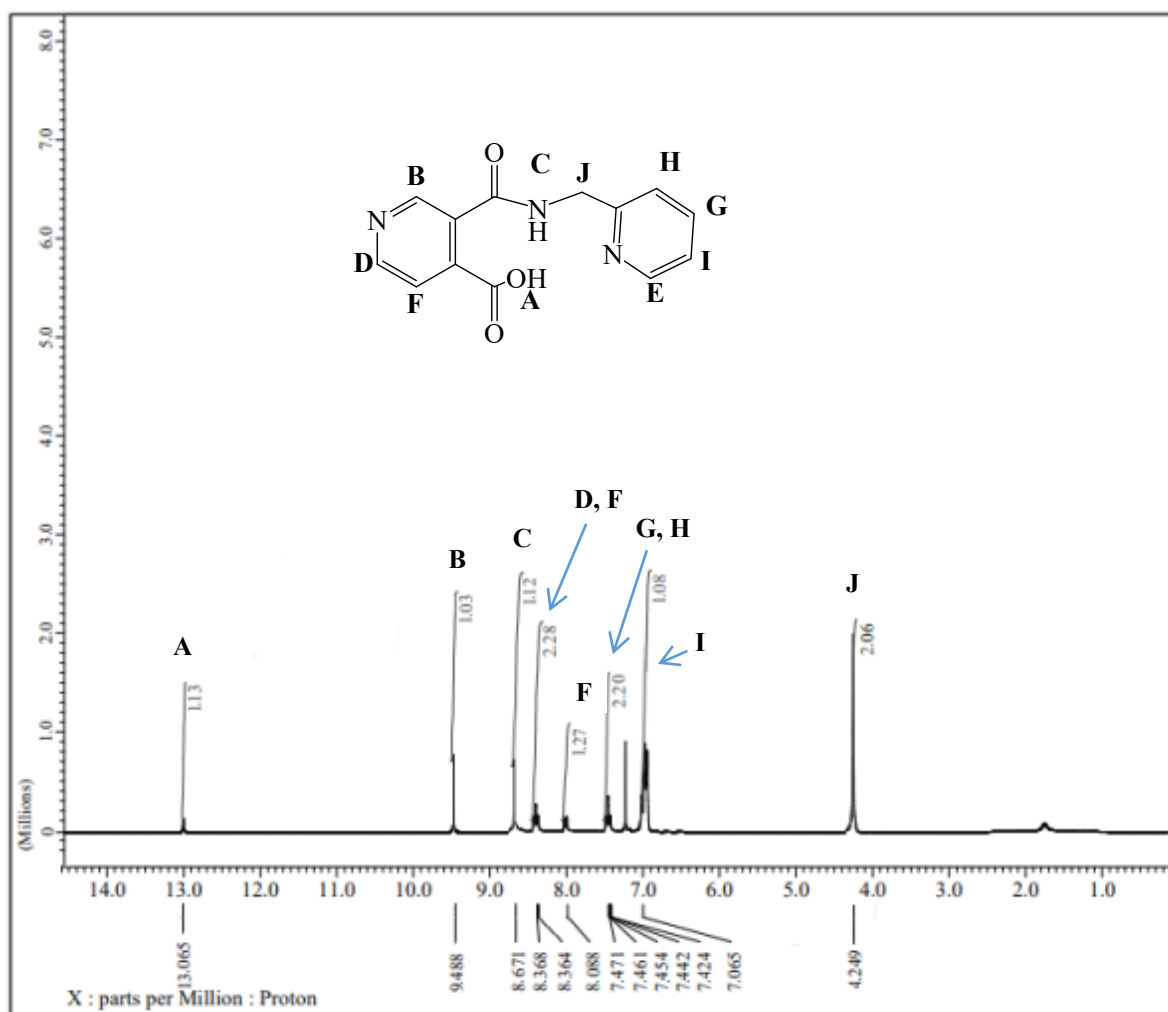

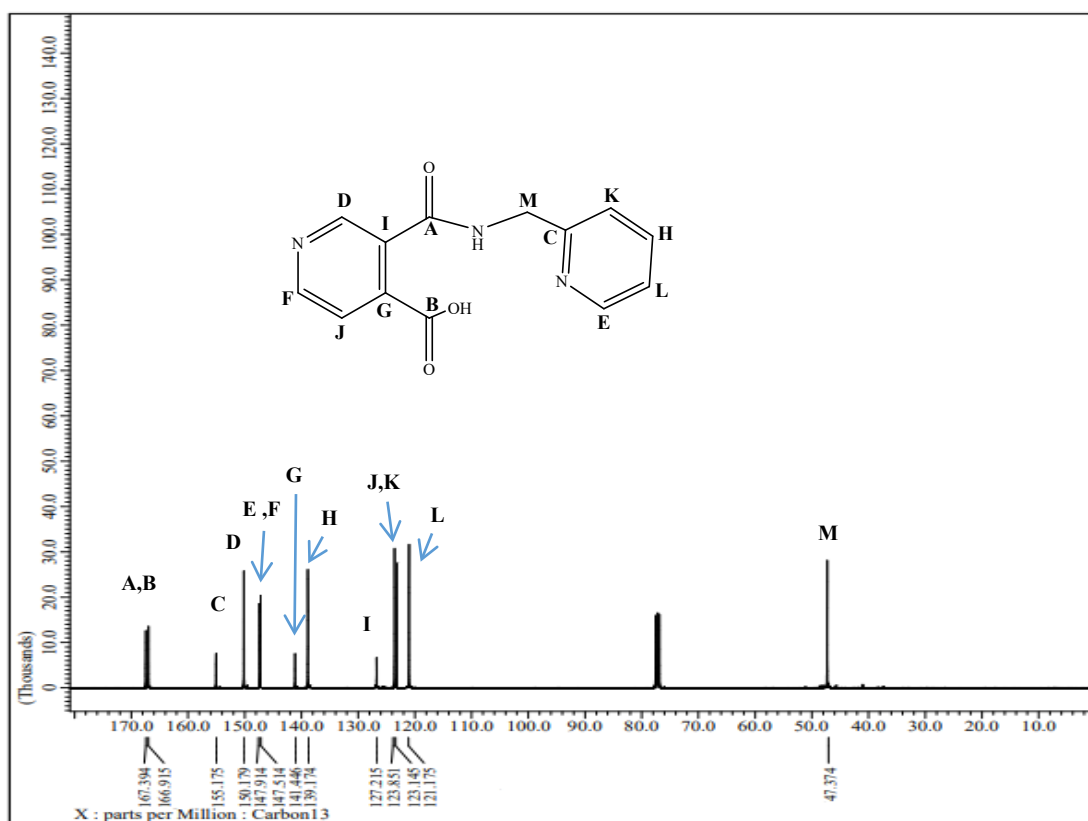

Figure S3- NMR spectrum of L in CDCl<sub>3</sub>

Table S1.1- Crystal data and structure refinement for L

|                                    |                                                               |
|------------------------------------|---------------------------------------------------------------|
| Identification code                | SNAD1                                                         |
| Empirical formula                  | C <sub>13</sub> H <sub>15</sub> N <sub>3</sub> O <sub>5</sub> |
| Formula weight                     | 293.28                                                        |
| Temperature/K                      | 298.15                                                        |
| Crystal system                     | triclinic                                                     |
| Space group                        | P-1                                                           |
| a/Å                                | 8.3624(6)                                                     |
| b/Å                                | 8.5232(8)                                                     |
| c/Å                                | 9.6931(8)                                                     |
| α/°                                | 92.749(7)                                                     |
| β/°                                | 92.290(6)                                                     |
| γ/°                                | 96.721(7)                                                     |
| Volume/Å <sup>3</sup>              | 684.61(10)                                                    |
| Z                                  | 2                                                             |
| ρ <sub>calc</sub> /cm <sup>3</sup> | 1.423                                                         |
| μ/mm <sup>-1</sup>                 | 0.111                                                         |
| F(000)                             | 308.0                                                         |
| Crystal size/mm <sup>3</sup>       | 0.2 × 0.2 × 0.1                                               |
| Radiation                          | MoKα (λ = 0.71073)                                            |
| 2θ range for data collection/°     | 6.616 to 49.986                                               |

|                                                |                                                               |
|------------------------------------------------|---------------------------------------------------------------|
| Index ranges                                   | $-9 \leq h \leq 9, -10 \leq k \leq 10, -10 \leq l \leq 11$    |
| Reflections collected                          | 5220                                                          |
| Independent reflections                        | 2396 [ $R_{\text{int}} = 0.0253, R_{\text{sigma}} = 0.0372$ ] |
| Data/restraints/parameters                     | 2396/0/200                                                    |
| Goodness-of-fit on $F^2$                       | 1.023                                                         |
| Final R indexes [ $I \geq 2\sigma(I)$ ]        | $R_1 = 0.0461, wR_2 = 0.1162$                                 |
| Final R indexes [all data]                     | $R_1 = 0.0654, wR_2 = 0.1333$                                 |
| Largest diff. peak/hole / $e \text{ \AA}^{-3}$ | 0.22/-0.25                                                    |

Table S1.2- Bond Angles of L1

| Atom | Atom | Atom | Angle/°     | Atom | Atom | Atom | Angle/°     |
|------|------|------|-------------|------|------|------|-------------|
| C7   | N2   | C8   | 120.19 (17) | O3   | C7   | C4   | 121.34 (18) |
| C13  | N3   | C9   | 122.12 (17) | N2   | C7   | C4   | 116.68 (17) |
| C1   | N1   | C5   | 117.05 (18) | N3   | C9   | C8   | 115.13 (16) |
| O2   | C6   | C3   | 116.93 (16) | N3   | C9   | C10  | 119.09 (17) |
| O1   | C6   | O2   | 124.44 (18) | C10  | C9   | C8   | 125.79 (17) |
| O1   | C6   | C3   | 118.63 (17) | N2   | C8   | C9   | 114.45 (16) |
| C3   | C4   | C7   | 123.77 (17) | C1   | C2   | C3   | 120.01 (19) |
| C3   | C4   | C5   | 118.02 (18) | C9   | C10  | C11  | 119.12 (19) |
| C5   | C4   | C7   | 118.19 (17) | N1   | C5   | C4   | 123.75 (19) |
| C4   | C3   | C6   | 122.03 (16) | N1   | C1   | C2   | 123.28 (19) |
| C2   | C3   | C6   | 120.09 (17) | N3   | C13  | C12  | 120.5 (2)   |
| C2   | C3   | C4   | 117.88 (18) | C12  | C11  | C10  | 120.4 (2)   |
| O3   | C7   | N2   | 121.90 (18) | C13  | C12  | C11  | 118.79 (19) |

Table S1.3 Bond Angle of L1

| Atom | Atom | Length/Å  | Atom | Atom | Length/Å  |
|------|------|-----------|------|------|-----------|
| O2   | C6   | 1.260 (2) | C4   | C3   | 1.387 (3) |
| O1   | C6   | 1.234 (2) | C4   | C7   | 1.493 (3) |
| O3   | C7   | 1.228 (2) | C4   | C5   | 1.387 (3) |
| N2   | C7   | 1.325 (2) | C3   | C2   | 1.380 (3) |
| N2   | C8   | 1.443 (2) | C9   | C8   | 1.496 (3) |
| N3   | C9   | 1.337 (2) | C9   | C10  | 1.371 (3) |
| N3   | C13  | 1.335 (3) | C2   | C1   | 1.364 (3) |
| N1   | C5   | 1.337 (3) | C10  | C11  | 1.372 (3) |
| N1   | C1   | 1.327 (3) | C13  | C12  | 1.351 (3) |
| C6   | C3   | 1.507 (3) | C11  | C12  | 1.370 (3) |

Table -S 2.1 Crystal data and structure refinement for Cu Complex

|                                             |                                                                 |
|---------------------------------------------|-----------------------------------------------------------------|
| Identification code                         | Amide 2 Cu                                                      |
| Empirical formula                           | C <sub>13</sub> H <sub>15</sub> CuN <sub>3</sub> O <sub>6</sub> |
| Formula weight                              | 371.81                                                          |
| Temperature/K                               | 298.15                                                          |
| Crystal system                              | monoclinic                                                      |
| Space group                                 | P2 <sub>1</sub> /n                                              |
| a/Å                                         | 8.5673(3)                                                       |
| b/Å                                         | 10.4935(4)                                                      |
| c/Å                                         | 16.3022(7)                                                      |
| $\alpha$ /°                                 | 90                                                              |
| $\beta$ /°                                  | 97.043(3)                                                       |
| $\gamma$ /°                                 | 90                                                              |
| Volume/Å <sup>3</sup>                       | 1454.52(10)                                                     |
| Z                                           | 4                                                               |
| $\rho_{\text{calc}}$ /g/cm <sup>3</sup>     | 1.698                                                           |
| $\mu$ /mm <sup>-1</sup>                     | 1.538                                                           |
| F(000)                                      | 760.0                                                           |
| Crystal size/mm <sup>3</sup>                | 0.3 × 0.2 × 0.1                                                 |
| Radiation                                   | MoK $\alpha$ ( $\lambda$ = 0.71073)                             |
| 2 $\theta$ range for data collection/°      | 6.88 to 49.994                                                  |
| Index ranges                                | -8 ≤ h ≤ 10, -11 ≤ k ≤ 12, -19 ≤ l ≤ 13                         |
| Reflections collected                       | 5941                                                            |
| Independent reflections                     | 2540 [ $R_{\text{int}}$ = 0.0213, $R_{\text{sigma}}$ = 0.0278]  |
| Data/restraints/parameters                  | 2540/0/219                                                      |
| Goodness-of-fit on F <sup>2</sup>           | 1.045                                                           |
| Final R indexes [ $I \geq 2\sigma(I)$ ]     | $R_1$ = 0.0295, $wR_2$ = 0.0727                                 |
| Final R indexes [all data]                  | $R_1$ = 0.0337, $wR_2$ = 0.0759                                 |
| Largest diff. peak/hole / e Å <sup>-3</sup> | 0.30/-0.33                                                      |

Table S-2.2 Selective Bond Angle for Cu-Complex

| Atom | Atom | Atom            | Angle      |
|------|------|-----------------|------------|
| O4   | Cu1  | N2              | 95.70 (8)  |
| O4   | Cu1  | O1              | 85.27 (8)  |
| O4   | Cu1  | N3 <sup>1</sup> | 91.87 (8)  |
| N1   | Cu1  | O4              | 175.89 (8) |
| N1   | Cu1  | N2              | 82.76 (8)  |
| N1   | Cu1  | O1              | 92.72 (8)  |
| N1   | Cu1  | N3 <sup>1</sup> | 92.24 (7)  |
| N2   | Cu1  | O1              | 128.72 (8) |
| N2   | Cu1  | N3 <sup>1</sup> | 114.00 (8) |
| O1   | Cu1  | N3 <sup>1</sup> | 117.22 (7) |

Table S-2.3 Selective bond length for Cu- Complex

| Atom Atom Length/Å |                 |             |
|--------------------|-----------------|-------------|
| Cu1                | O4              | 1.9530 (18) |
| Cu1                | N1              | 1.9446 (19) |
| Cu1                | N2              | 2.0111 (18) |
| Cu1                | O1              | 2.0506 (17) |
| Cu1                | N3 <sup>1</sup> | 2.1861 (19) |

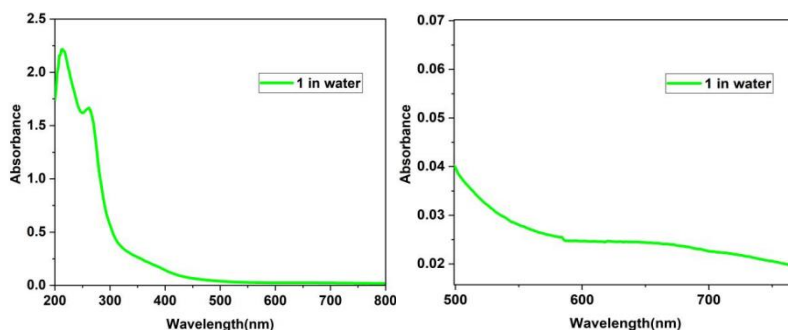

Figure S4- UV-Visible spectrum of 0.5 mM Complex **1** in water.

UV-Visible spectroscopic analysis of the complex after dissolving it in distilled water (Figure S4) reveals the presence of a broad absorption of  $\lambda_{\text{max}}$  at 650 nm which is a characteristic feature of Cu(II) centre d-d transition.<sup>1-2</sup> whereas Peak at 262 nm is designated as an n- $\pi^*$  transition.<sup>3</sup> Peak at 213 nm can also be designated to a characteristic ligand based  $\pi$ - $\pi^*$  transition.<sup>4</sup>

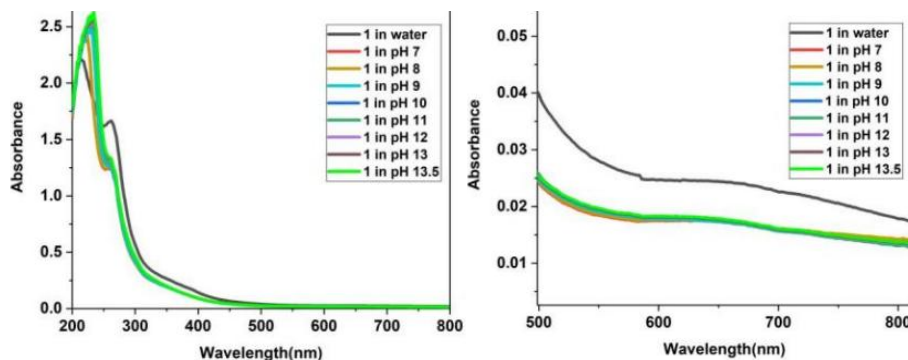



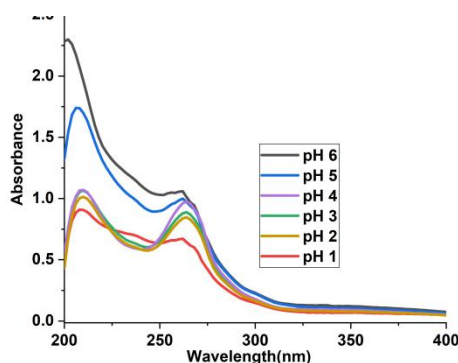

**Figure S5-** UV- visble spectra of 0.5 mM complex **1** in water with pH 7-13.5, Complex **1** at pH 7-13.5 and Complex **1** at pH 1-6.

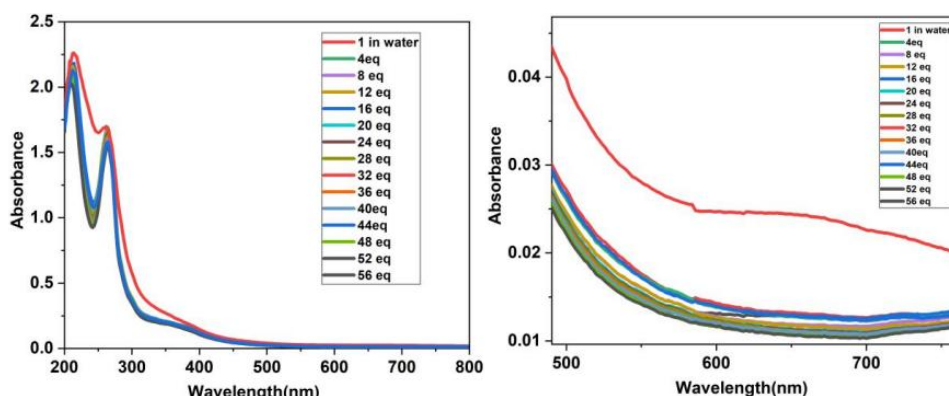

**Figure S6-** 0.5 mM complex **1** in water and 4-56 equivalent of Perchloric acid.

UV-Visible spectroscopic analysis of 0.5 mM complex **1** was done at pH 7-13.5 (Figure S5) where the observation are conclusively proving the higher stability of the **1**. Peak at 650 nm assigned for d-d transition acutely decreases at pH 7 whereas increases from pH 7-13.5. Same phenomenon is observed at 262 nm without any deviation in the peak. With increase in the basicity of the solution peak at 213 nm starts to shift 5-7 nm everytime the basicity of the complex solution is enhanced by using phospahte buffer solution.<sup>5</sup> Similarly, 0.5 mM complex solution was spectrochemically analyzed on UV-Visible spectroscopy to observe the characteristic change and stability at acidic conditions. At 650 nm a decrease in the absorbance is observed with addition of acid, this externally added acid to the system gets bonded to the metal centre, likewise at 262 nm and 213 nm the absorption decreases with increase in the acidity (4-56 equivalent perchloric acid) of the complex aqua solution (Figure S6). The addition of the proton to the metal centre<sup>6</sup> facilitates the metal centre to be highly involved in HER and further in reduction of proton.

### ***Electrocatalytic Proton Reduction, Carbon dioxide Reduction and water oxidation***

Typical three electrode system with glassy carbon as working , Platinum as counter and Ag/AgCl (aq.) as reference electrodes were used. 3 M KCl was prepared and used in the counter electrode during all the electrochemical analysis. A fixed scan rate of 100 mV/s was maintained during all electrochemical experiments for cathodic and anodic scans otherwise provided.

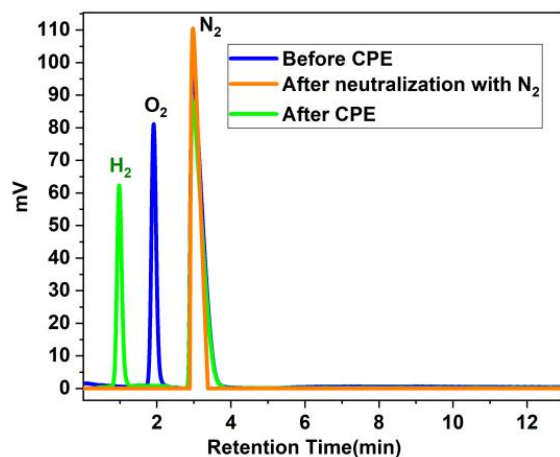

**Figure S7-** GC trace of  $\text{H}_2$  for complex **1** after 2 hours of CPE at -1.6 V.

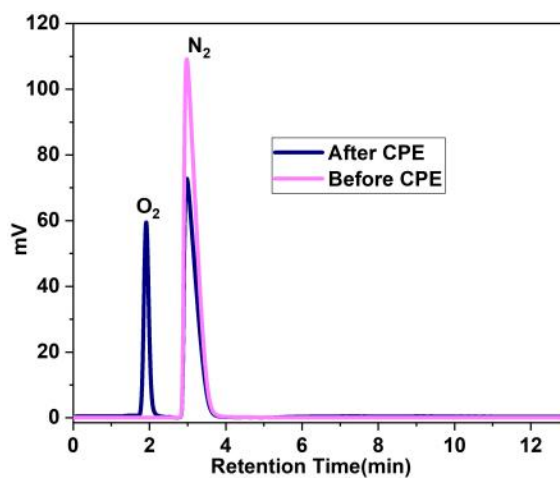

**Figure S8-** GC trace of  $\text{O}_2$  after 2 hours of CPE at +1.45 V.

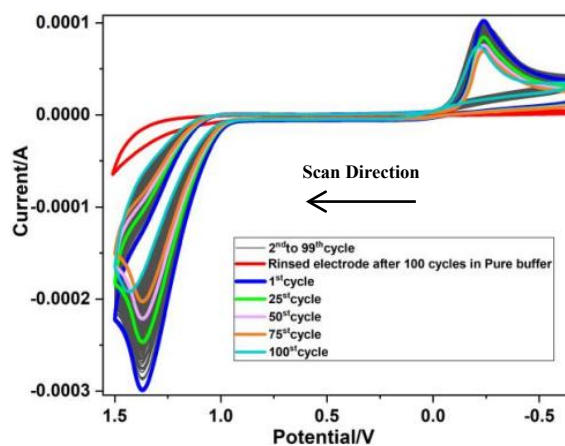

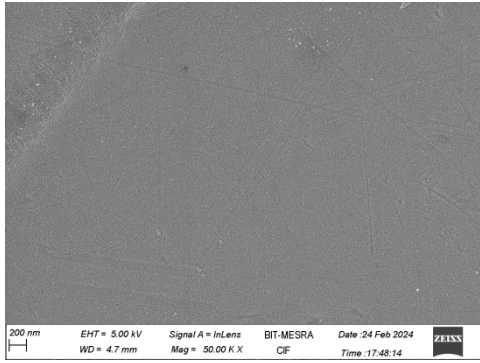

Before 100 Cycles

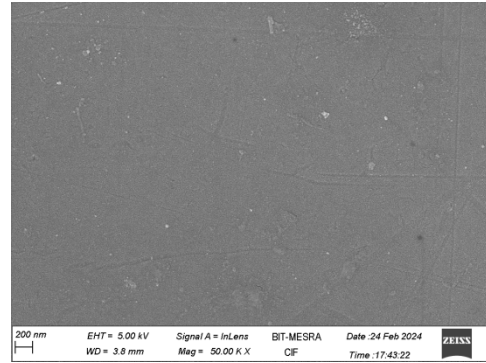

After 100 Cycles

kV: 20 Mag: 1000 Takeoff: 35 Live Time(s): 30 Amp Time(μs): 7.68 Resolution:(eV) 129.5

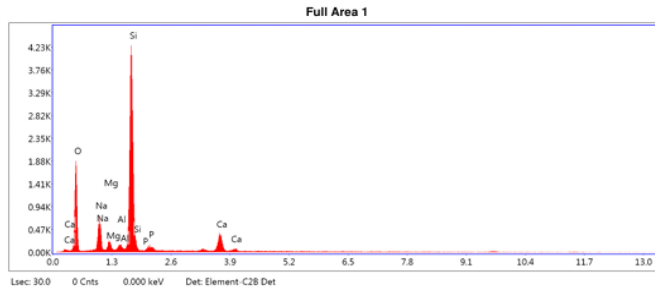

Before 100 Cycles

#### eZAF Smart Quant Results

| Element | Weight % | Atomic % | Net Int. | Error % | Kratio | Z      | R      | A      | F      |
|---------|----------|----------|----------|---------|--------|--------|--------|--------|--------|
| O K     | 39.00    | 52.71    | 353.74   | 9.39    | 0.1107 | 1.0597 | 0.9690 | 0.2680 | 1.0000 |
| NaK     | 10.75    | 10.11    | 150.96   | 8.90    | 0.0451 | 0.9636 | 0.9954 | 0.4327 | 1.0069 |
| MgK     | 1.49     | 1.32     | 30.08    | 14.66   | 0.0074 | 0.9803 | 1.0031 | 0.5018 | 1.0128 |
| AlK     | 0.46     | 0.37     | 11.17    | 33.41   | 0.0028 | 0.9442 | 1.0103 | 0.6334 | 1.0233 |
| SiK     | 40.77    | 31.39    | 1156.25  | 4.05    | 0.2978 | 0.9651 | 1.0171 | 0.7539 | 1.0037 |
| P K     | 0.22     | 0.15     | 3.67     | 22.15   | 0.0011 | 0.9271 | 1.0235 | 0.5451 | 1.0060 |
| CaK     | 7.31     | 3.95     | 121.99   | 5.64    | 0.0623 | 0.9116 | 1.0505 | 0.9179 | 1.0172 |

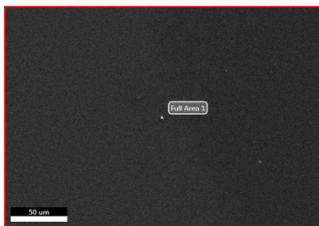

kV: 20 Mag: 1000 Takeoff: 35 Live Time(s): 30 Amp Time(μs): 7.68 Resolution:(eV) 129.5

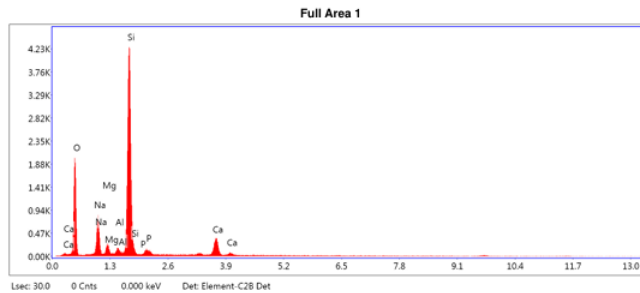

After 100 Cycles

#### eZAF Smart Quant Results

| Element | Weight % | Atomic % | Net Int. | Error % | Kratio | Z      | R      | A      | F      |
|---------|----------|----------|----------|---------|--------|--------|--------|--------|--------|
| O K     | 39.73    | 53.40    | 385.31   | 9.28    | 0.1152 | 1.0588 | 0.9696 | 0.2738 | 1.0000 |
| NaK     | 10.89    | 10.19    | 159.52   | 8.87    | 0.0456 | 0.9628 | 0.9960 | 0.4317 | 1.0068 |
| MgK     | 1.66     | 1.47     | 35.12    | 14.33   | 0.0083 | 0.9795 | 1.0036 | 0.5000 | 1.0125 |
| AlK     | 0.48     | 0.38     | 12.14    | 28.85   | 0.0029 | 0.9434 | 1.0108 | 0.6300 | 1.0228 |
| SiK     | 40.02    | 30.65    | 1181.72  | 4.08    | 0.2908 | 0.9642 | 1.0176 | 0.7508 | 1.0037 |
| P K     | 0.24     | 0.17     | 4.31     | 22.40   | 0.0012 | 0.9263 | 1.0240 | 0.5481 | 1.0059 |
| CaK     | 6.98     | 3.74     | 121.85   | 5.63    | 0.0594 | 0.9108 | 1.0509 | 0.9191 | 1.0174 |

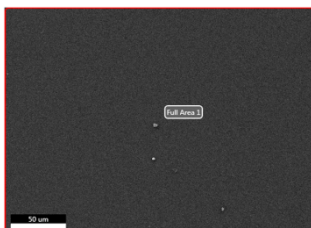

DLS

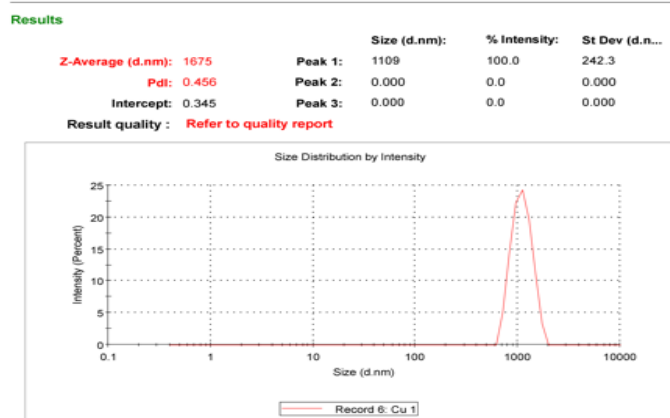

**Figure S9-** 100 cycles of consecutive CV at pH 13.5 for complex **1** and CV of rinsed working electrode (glassy carbon) in pH 13.5 buffer. FESEM images of glassy carbon before 100 Cycles of CV and after 100 cycles of CV at pH 13.5. EDS images of glassy carbon before 100 Cycles of CV and after 100 cycles of CV at pH 13.5(ITO only for FESEM and EDS ). DLS of the catalytic solution after 2 hours of CPE at +1.45 V vs Ag/AgCl at pH 13.5 using glassy carbon.

Since the design of the FESEM/EDX machine doesn't allowed us to mount the glassy carbon on for analysis, ITO glass was used in the rerun of 100 cycles of CV at pH 13.5 and analyze for any metal oxide nano-particles.

#### Calculation of $K_{cat}$ for water oxidation through peak current method

The slope of peak current of complex **1**  $Cu^{II} Cu^{II}/Cu^{II} Cu^I$  couple at different scan rate vs square root of the respective scan rate results in the calculation of diffusion coefficient when used against the Randles-Sevcik relation (eq S1). The scan rate dependent measurements revealed that the  $Cu^{II} Cu^{II}/Cu^{II} Cu^I$  is diffusion controlled. Thus, a diffusion coefficient of  $9.15 \times 10^{-7} \text{ cm}^2 \text{ s}^{-1}$  is calculated which is reasonable in water as the solvent<sup>2</sup>.

$$i_p = 0.446nFA[Cu] \left( \frac{v n F D_{Cu}}{RT} \right)^{1/2} \quad \text{eq S1}$$

$$i_{cat} = n_{cat}FA[Cu](k_{cat}D_{Cu})^{1/2} \quad \text{eq S2}$$

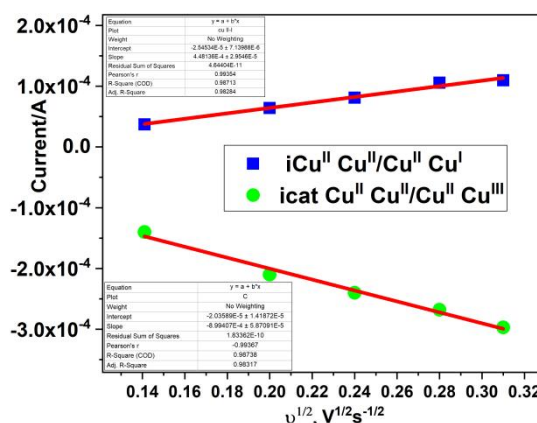

**Figure S10-** The plot of  $i_{cat} Cu^{II} Cu^{II}/Cu^{II} Cu^{III}$  and  $i_{Cu^{II} Cu^{II}/Cu^{II} Cu^I}$  vs the square root of the scan rate.

T: ITMS + c ESI Full ms [200.00-1500.00]

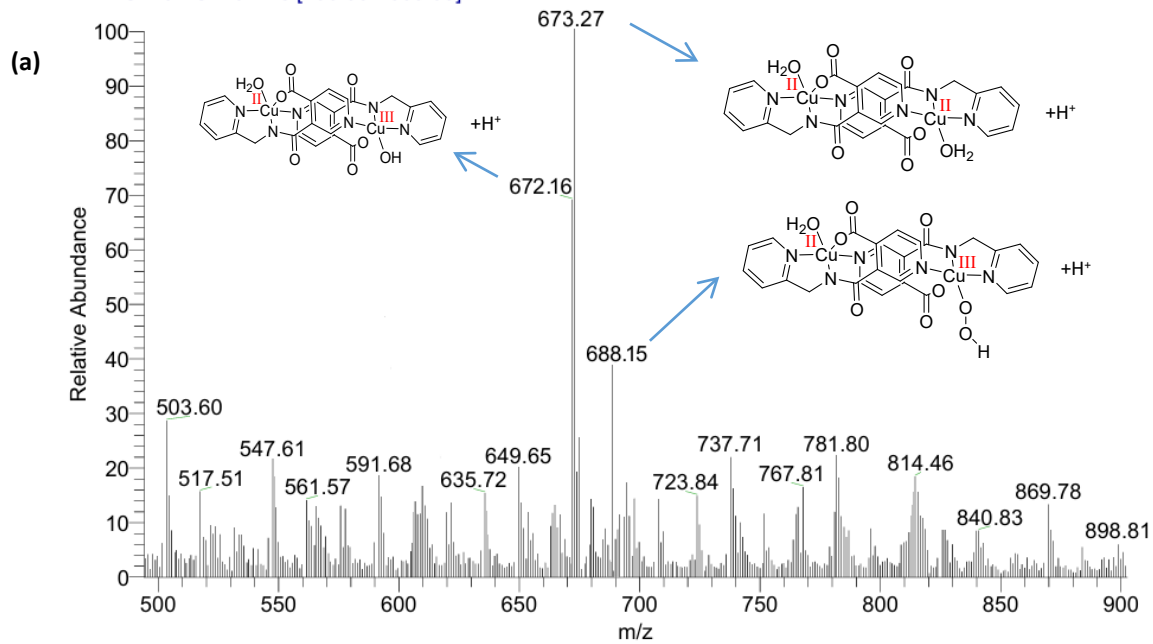

T: ITMS + c ESI Full ms [200.00-1500.00]

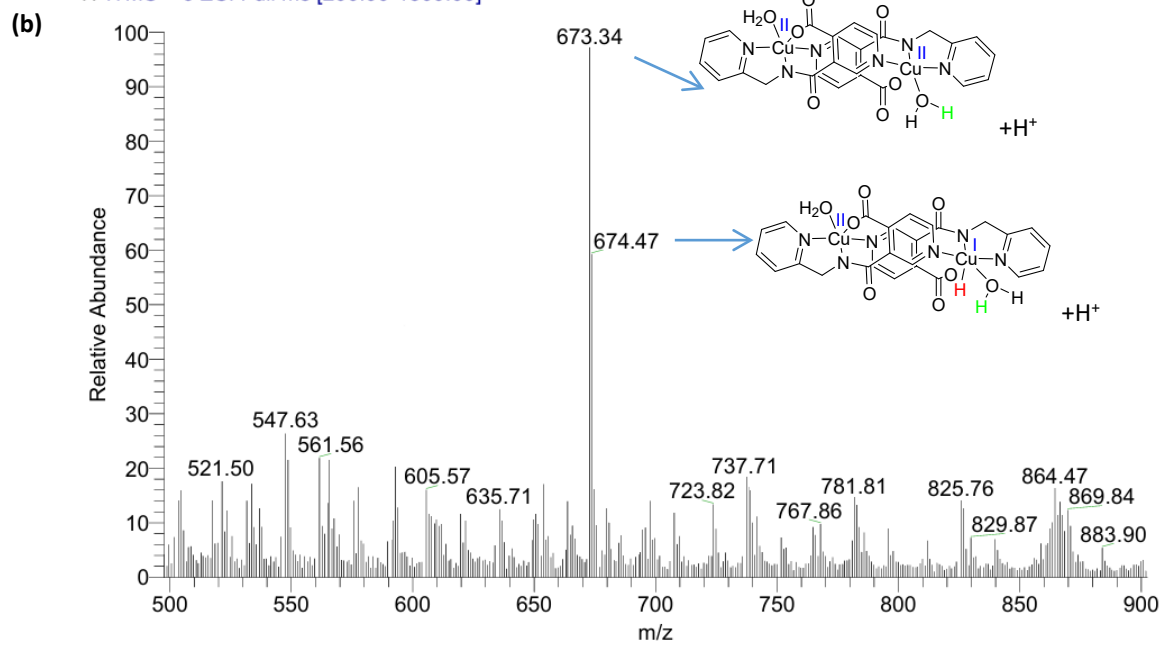

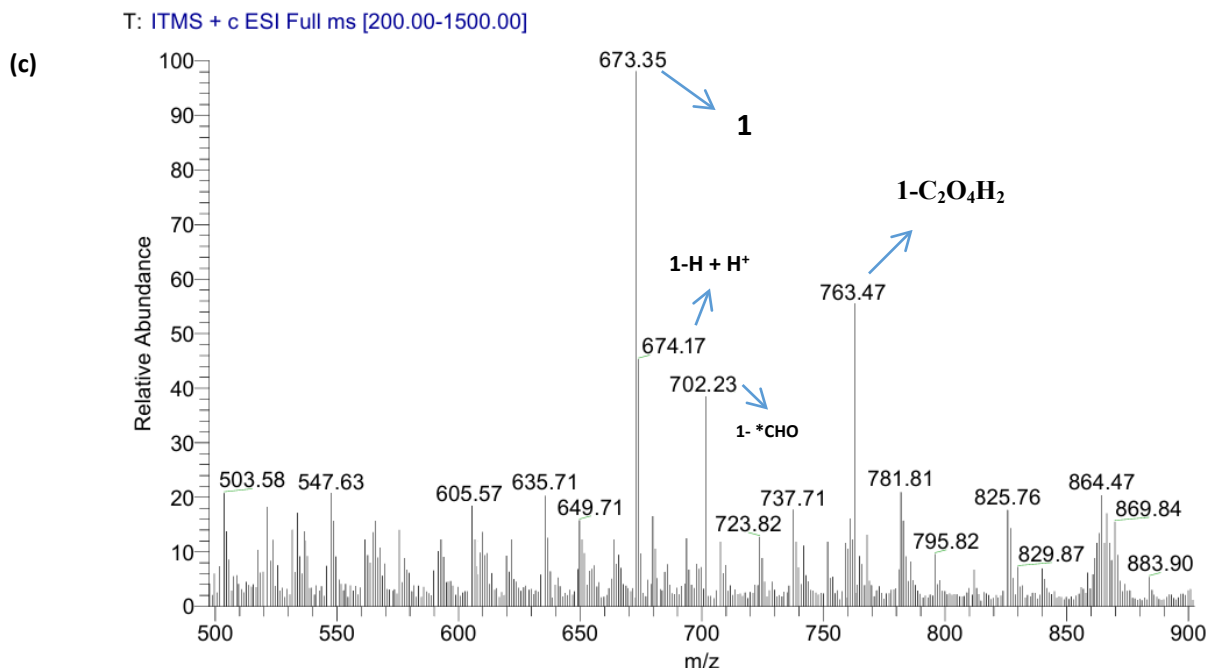

**Figure S11** (a)- Mass spectrum of Complex **1** after 2 hours of CPE at +1.45 V vs Ag/AgCl, pH 13.5 Phosphate buffer and 0.5 mM concentration. (b)- Mass spectrum of 0.5 mM concentration Complex **1** after 2 hours of CPE at -1.6 V vs Ag/AgCl with 56 eq. Perchloric acid. (c) Mass spectrum of 0.5 mM concentration Complex **1** after 4.5 hours of CPE at -2.15 V vs Ag/AgCl with 8 eq. Perchloric acid and purging CO<sub>2</sub> for 60 minutes (see Figure-10).

### Calculation of Faradaic Efficiency and TON F.E for Hydrogen generation

Controlled Potential Electrolysis at -1.6 V vs Ag/AgCl was done for complex **1** where 4.92 C of total charge was observed with a change of 0.4 cm (h) in the height of displaced volume of catalytic solution in the cell holding glassy carbon. With a radius of 1.1 cm of the cell, volume of the gas generated was calculated using  $V = \pi(r)^2h$ . Thus,  $V = 1.05 \text{ cm}^3$  or 1.05 ml was calculated. Converting it into the number of moles using conversion factor of 24.0 L per mole of any ideal gas we get  $0.0437 \times 10^{-3}$  moles *i.e* the moles of H<sub>2</sub> generated experimentally.

$$\begin{aligned}\text{Now, Total Charge} &= \text{Charge}_{\text{cat.}} - \text{Charge}_{\text{blank}} \\ &= 10.22 - 0.007 \text{ C} \\ &= 10.21 \text{ C}\end{aligned}$$

Theoretical Moles of Hydrogen Made via Total Charge:  $10.21 \text{ C} \times (1 \text{ mol e}^- / 96485 \text{ C}) \times (1 \text{ mol H}_2 / 2 \text{ mol e}^-) = 5.29 \times 10^{-5} \text{ moles H}_2 \text{ theoretical}$

Faradaic Efficiency = ( Experimental moles of H<sub>2</sub> ) / (moles of H<sub>2</sub> calculated theoretically) x 100%

$$\begin{aligned}&= (0.0000437 / 0.0000529) \times 100 \\ &= 83 \%\end{aligned}$$

**TON of 1 for H<sub>2</sub> Generation**

The Bulk electrolysis for 2 hours at -1.6 V vs Ag/AgCl with 56 eq. of perchloric acid produces 1.05 ml of Hydrogen. Catalytic loss during this timeline was calculated using the UV-Visible spectroscopic analysis of **1** before and after CPE which was ~8%. Using these values a TON was deduced.

$$(1.05/22400) \times (10^3 / 0.5 \times 10^{-3} \times 2) \times (100/8)$$

$$\text{TON}_{\text{Hydrogen}} = \sim 586$$

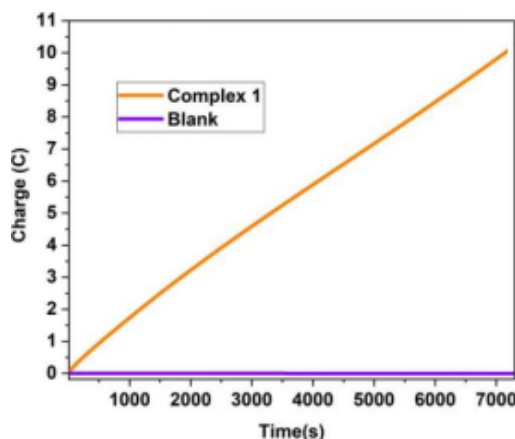

**Figure S12(a)**- Total charge accumulated after 2 hours of CPE of complex **1** at -1.6 V vs Ag/AgCl.

#### F. E for Oxygen generation

$$F. E = 4 \times \text{amount of } O_2 \text{ (moles)} \times 100 / n \text{ (moles of electron)}$$

$$n = Q \text{ (charge)} / F \text{ (Faraday Constant)}$$

The total charge accumulated after 2 hours of CPE was found to be 10.40 C which is used to calculate the number of moles of electrons. While during the CPE a change of 0.2 cm of height in the catalytic solution was observed in the cell containing working electrode. Thus, using the formula  $V = \pi(r)^2h$ , a volume of 0.52 cm<sup>3</sup> or ml was observed. Later dividing it by 24.0 L per mole of any ideal gas we get  $0.021 \times 10^{-3}$  moles of O<sub>2</sub> generated electrochemically (experimentally). Using the above formula we get.

$$= (4 \times 0.000021 / 0.00010) \times 100$$

$$= 84 \%$$

#### TON of **1** for OER

The bulk electrolysis produces 0.52 ml of O<sub>2</sub> in 2 hours at +1.45 V vs Ag/AgCl. CV taken after the CPE exhibits that the catalytic loss is around 17.56%. Employing the catalytic concentration and these data we can calculate the TON of **1**.

$$(0.52/22400) \times (10^3/0.5 \times 10^{-3} \times 4) \times (100/17.56)$$

$$\text{TON}_{\text{Oxygen}} = 66$$



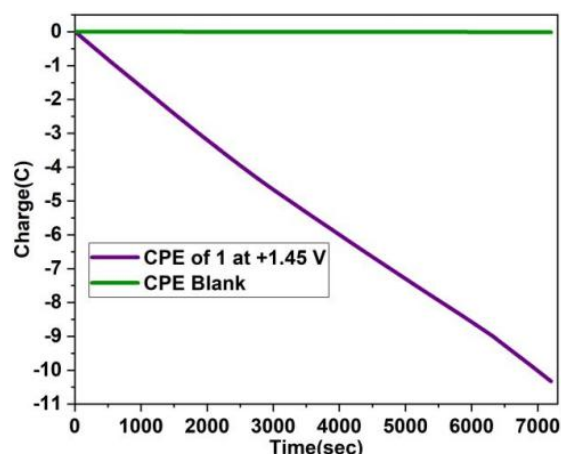

**Figure S12(b)**- Total charge accumulated after 2 hours of CPE of complex **1** at +1.45 V vs Ag/AgCl.

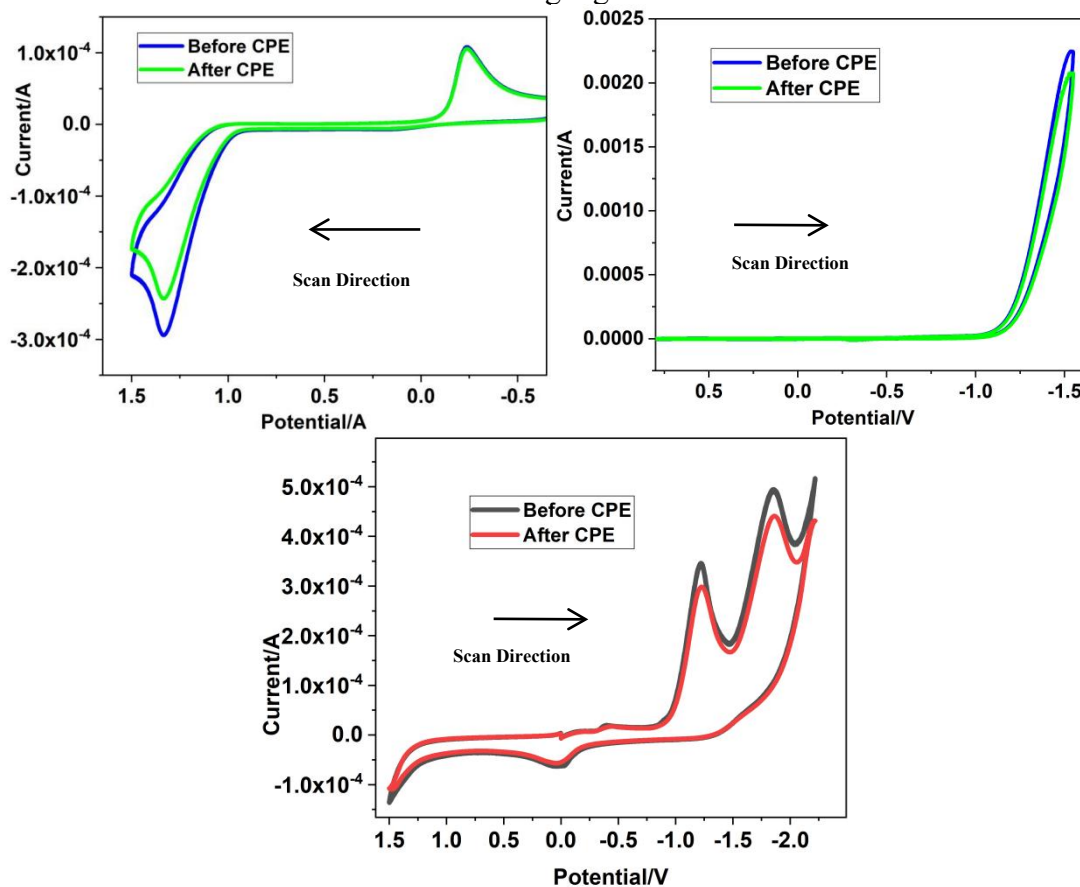

**Figure S13**- (A) CV of Complex **1** in phosphate buffer solution at pH 13.5 before CPE and after 2 hours of CPE with 0.5 mM conc. at +1.45 V vs Ag/AgCl (B) CV of **1** before and after CPE with 0.5 mM conc. at -1.6 V vs Ag/AgCl for 2 hours (C) CV of **1** before and after CPE with 0.5 mM conc. at -2.15 V vs Ag/AgCl for 4.5 hours.



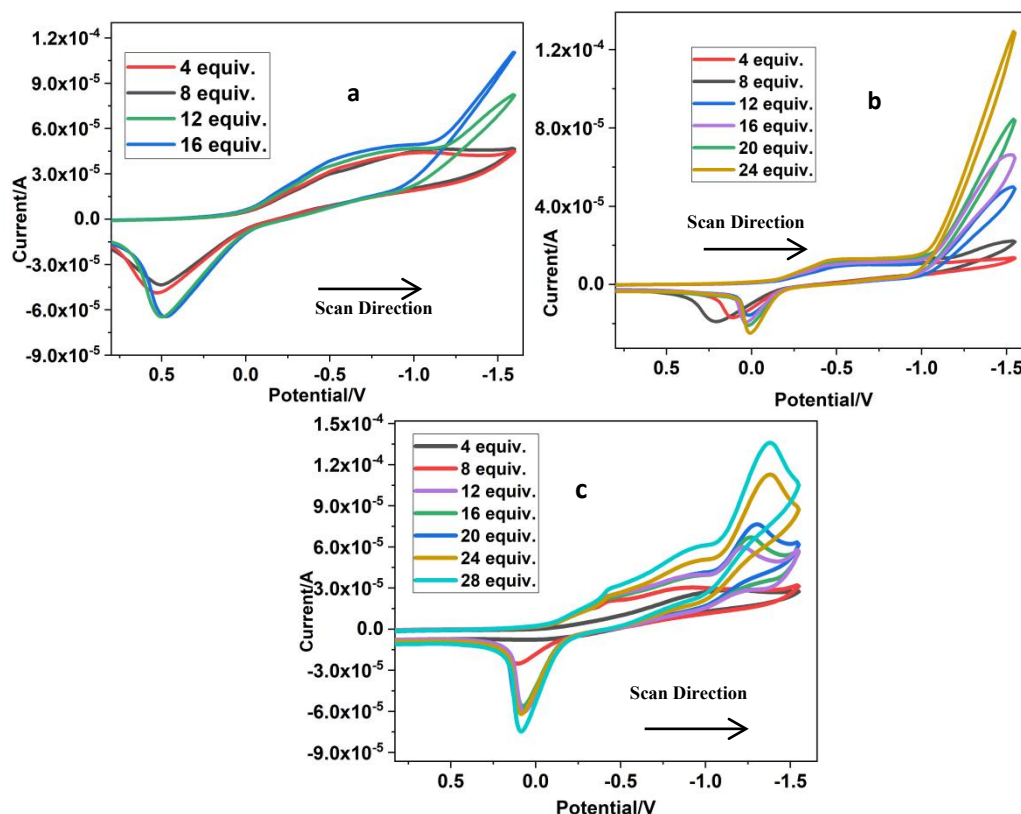

**Figure S14-** CV of cathodic segment **1** in water,  $c = 0.5 \text{ mM}$ , Scan rate =  $100 \text{ mV/s}$ , internal reference Ag/AgCl (Aqueous), Working electrode-glassy Carbon in different acids. (a) Acetic acid (b) orthophosphoric acid (c) Hydrochloric acid.

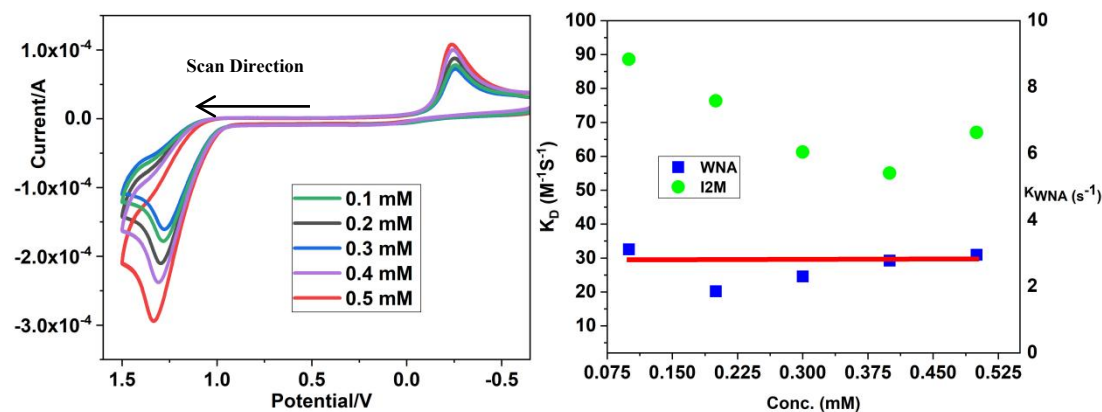

**Figure S15-** CV of complex **1** with concentration  $0.1 \text{ mM}$  to  $0.5 \text{ mM}$  in  $\text{pH } 13.5$  phosphate buffer solution with scan rate of  $100 \text{ mV/s}$  and glassy carbon working electrode .

**Table S3-** of comparative catalytic efficiency

| Catalyst | Efficiency                              | Experimental Condition   | Working Electrode | Process         | Ref.      |
|----------|-----------------------------------------|--------------------------|-------------------|-----------------|-----------|
| <b>1</b> | TOF- $\text{H}_2 = 1679 \text{ s}^{-1}$ | Perchloric acid in Water | Glassy Carbon     | Electrochemical | This work |

|       |                                                                                              |                                                                                      |                                      |                                            |                        |
|-------|----------------------------------------------------------------------------------------------|--------------------------------------------------------------------------------------|--------------------------------------|--------------------------------------------|------------------------|
|       | TOF- O <sub>2</sub> =<br>31 s <sup>-1</sup><br>TOF-CO <sub>2</sub> RR<br>= 4 h <sup>-1</sup> | Sodium phosphate<br>buffer, pH 13.5<br>CO <sub>2</sub> + Perchloric acid in<br>Water | Glassy<br>Carbon<br>Glassy<br>Carbon | Electroc<br>hemical<br>Electroc<br>hemical | This work<br>This work |
| 2-4   | TOF- H <sub>2</sub> =<br>1473 s <sup>-1</sup> , 700<br>s <sup>-1</sup> , 926 s <sup>-1</sup> | AcOH in 95:5 (v/v)<br>DMF/H <sub>2</sub> O                                           | Glassy<br>Carbon                     | Electroc<br>hemical                        | 3                      |
| 5     | TOF- O <sub>2</sub> =<br>8.03 s <sup>-1</sup>                                                | KOH in water                                                                         | Boron-<br>doped<br>diamond           | Electroc<br>hemical                        | 4                      |
| 6     | TOF- O <sub>2</sub> =<br>0.12 s <sup>-1</sup>                                                | Phosphate buffer, pH<br>12.0                                                         | Glassy<br>Carbon                     | Electroc<br>hemical                        | 5                      |
| 7     | TOF- O <sub>2</sub> =<br>0.4 s <sup>-1</sup>                                                 | pH 12.4, 0.1 M<br>NaOH/NaOAc                                                         | Glassy<br>Carbon                     | Electroc<br>hemical                        | 6                      |
| 8-10  | TOF- O <sub>2</sub> = 88<br>s <sup>-1</sup> , 1462<br>s <sup>-1</sup> , 10 s <sup>-1</sup>   | 0.1M phosphate buffer at<br>pH13.0                                                   | Glassy<br>Carbon                     | Electroc<br>hemical                        | 7                      |
| 11    | TOF- O <sub>2</sub> =<br>100 s <sup>-1</sup>                                                 | 0.1M aqueous electrolyte<br>(NaOAc, NaOH), pH=11.<br>8–13.3                          | Glassy<br>Carbon                     | Electroc<br>hemical                        | 8                      |
| 12    | TON- H <sub>2</sub> =<br>364                                                                 | phosphate buffer at pH<br>7, solvent water                                           | Glassy<br>Carbon                     | Electroc<br>hemical                        | 9                      |
| 13    | TOF- H <sub>2</sub> =<br>303 s <sup>-1</sup>                                                 | TFA, 0.1 M (Bu <sub>4</sub> N)PF <sub>6</sub>                                        | Glassy<br>Carbon                     | Electroc<br>hemical                        | 10                     |
| 14-15 | F.E = 72%<br>and 84%                                                                         | DMF using 0.1M TBAP                                                                  | Glassy<br>Carbon                     | Electroc<br>hemical                        | 12                     |
| 16    | TOF = 1.6194<br>X 10 <sup>-2</sup> h <sup>-1</sup>                                           | ACN 0.1M Bu <sub>4</sub> NClO <sub>4</sub>                                           | Glassy<br>Carbon                     | Electroc<br>hemical                        | 13                     |

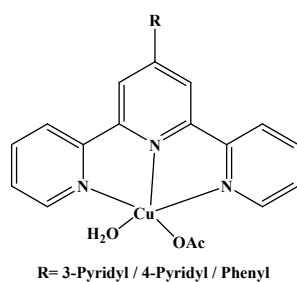

2-4

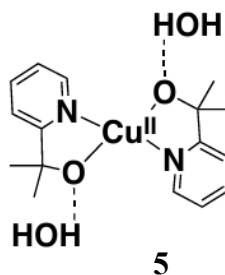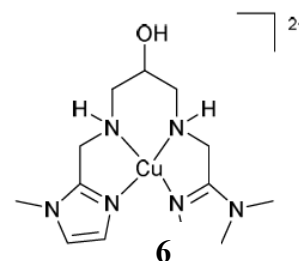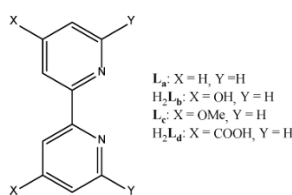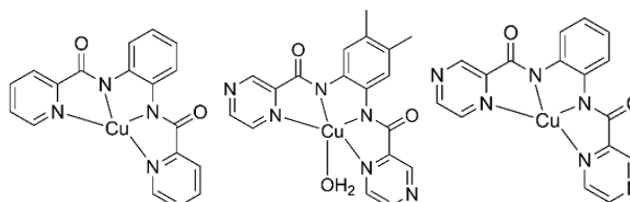

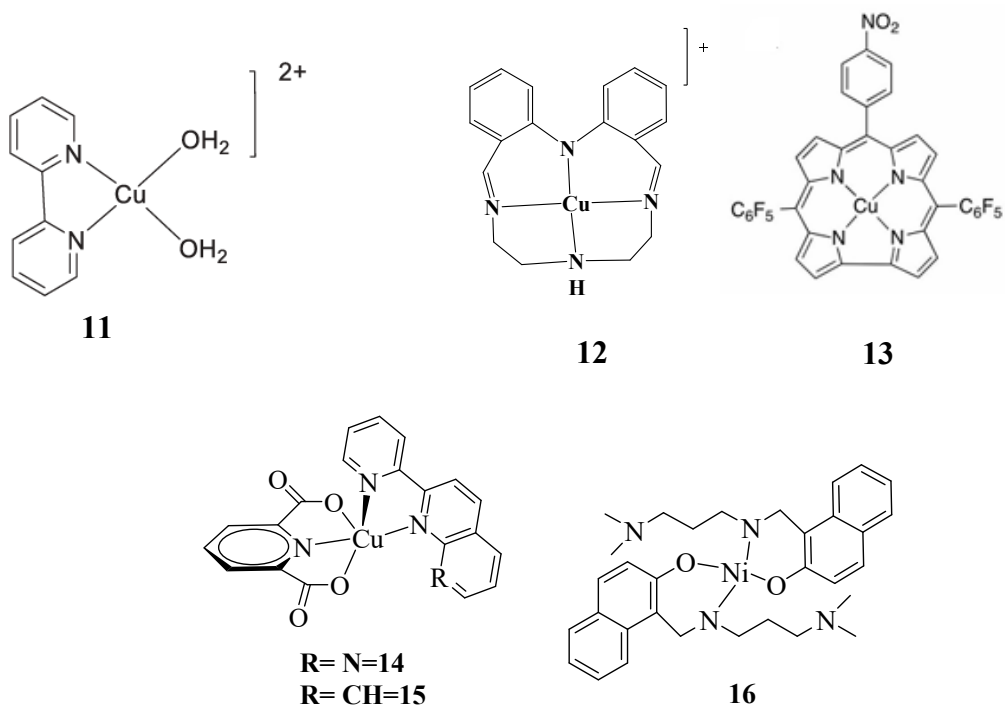

**Figure S16-** Copper based proton reducing and water oxidizing catalysts

### Elemental Analysis

The CHNS analysis was done to determine the % composition of C, N, H and S in the parent complex Dinuclear Cu-complex: **Cu<sub>2</sub>L<sub>2</sub>.2H<sub>2</sub>O** which further disintegrates into **1**. Thus, the Anal.Calc.for Chemical Formula: C<sub>26</sub>H<sub>22</sub>Cu<sub>2</sub>N<sub>6</sub>O<sub>8</sub> (%) : C 46.36; H 3.29; Cu 18.87; N 12.48; O, 19.00. Found: C 46.38; H 3.307; N 12.43, S 0.007.

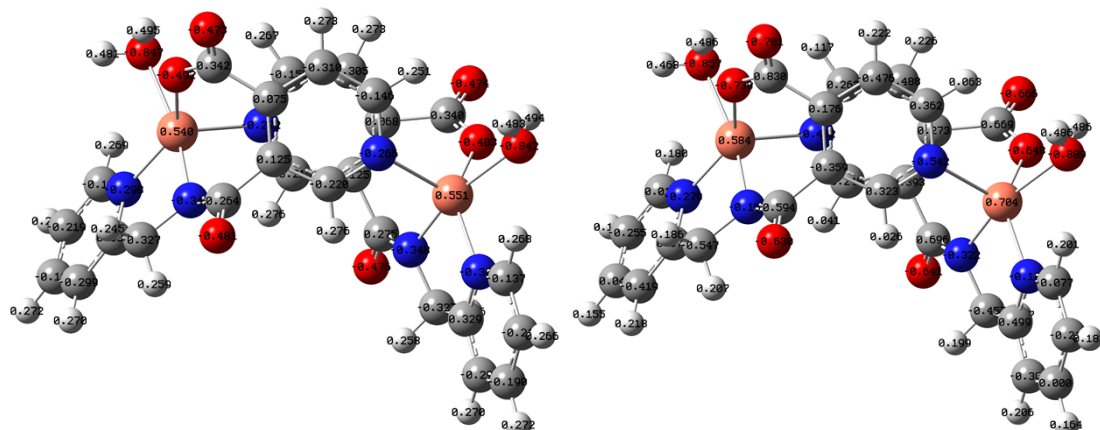

**Figure S 17-** (a) Atomic charges obtained using the Mulliken population analysis (b) Electrostatic Potential Charges (ESP) on respective atoms for complex **1**.

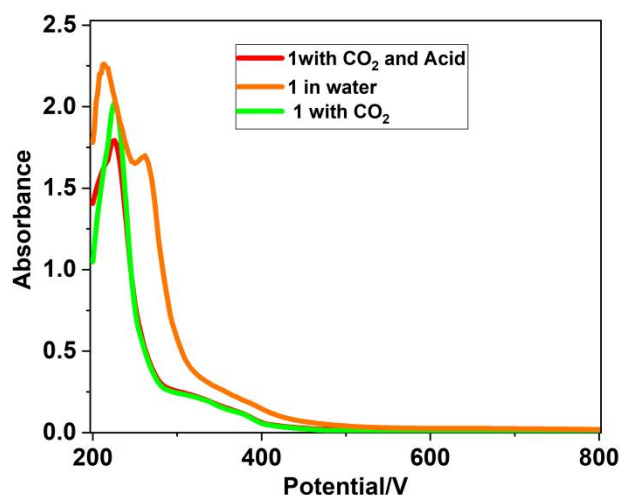

**Figure S 18-** UV-Visible spectra of 0.5 mM of **1**, **1** after purging CO<sub>2</sub> for 60 minutes and with 8 eq of perchloric acid.

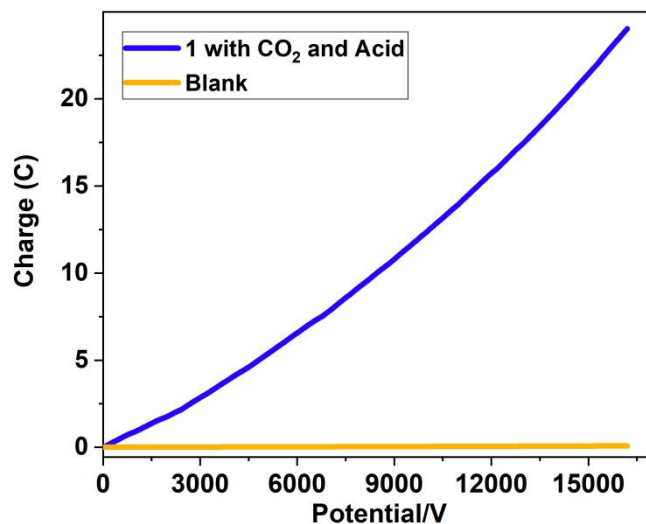

**Figure S 19-** 270 minutes of CPE of **1** after purging CO<sub>2</sub> for 60 minutes with 8 eq of perchloric acid and 0.5 mM of **1** at 2.15 V vs Ag/AgCl and CPE of blank solution with purging CO<sub>2</sub> for 60 minutes with 8 eq of perchloric acid at 2.15 V vs Ag/AgCl.

## Gas Chromatography For CO<sub>2</sub>RR

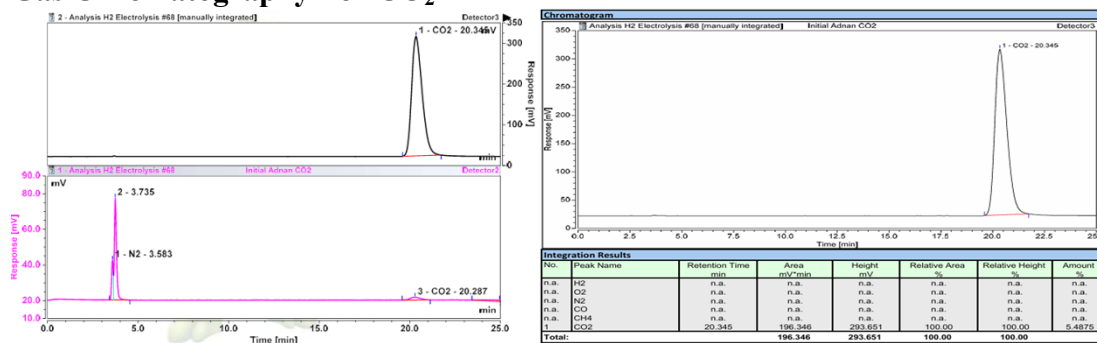

(a) Before CPE

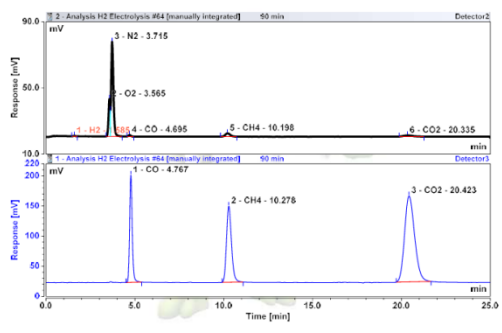

(b) After 90 min

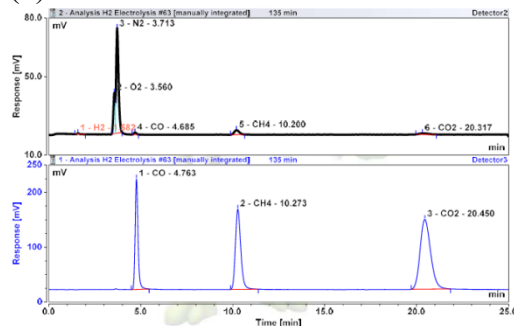

(c) After 135 min

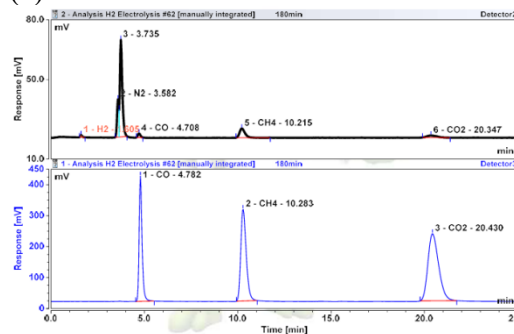

(d) After 180 min

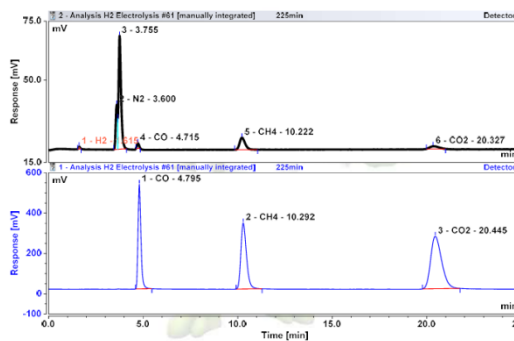

(e) After 225 min

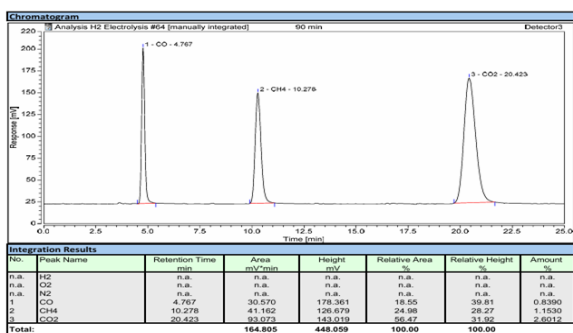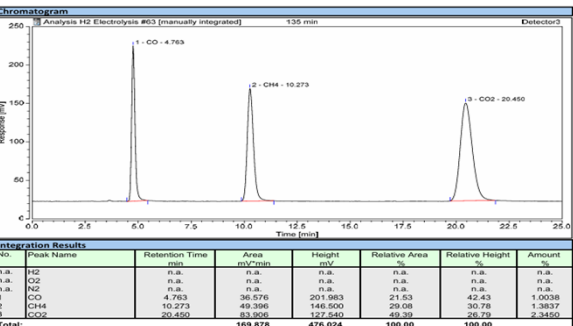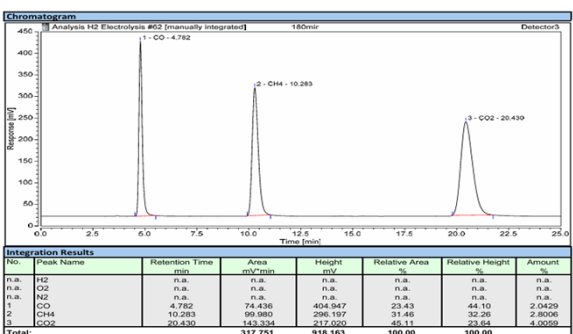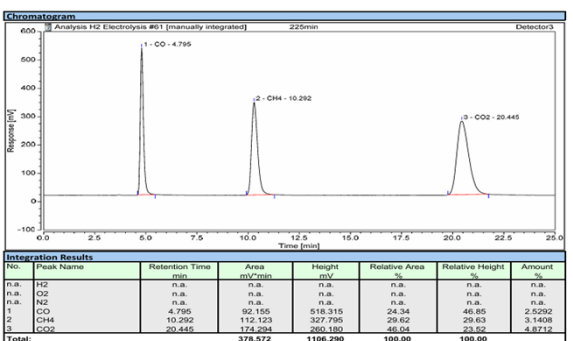

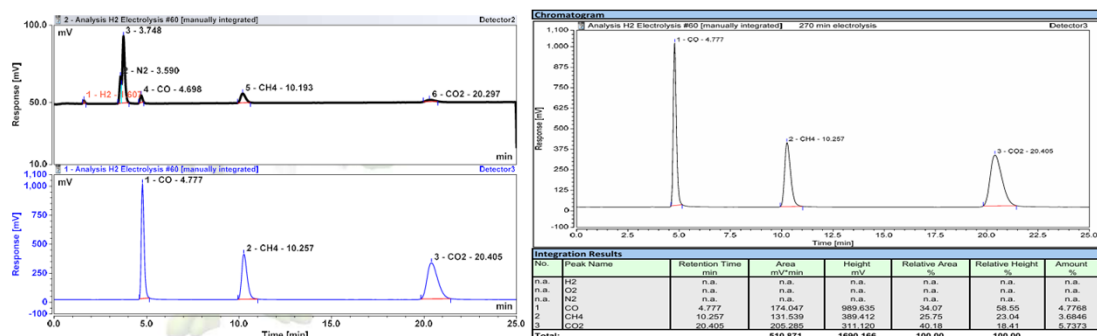

(f) After 270 min

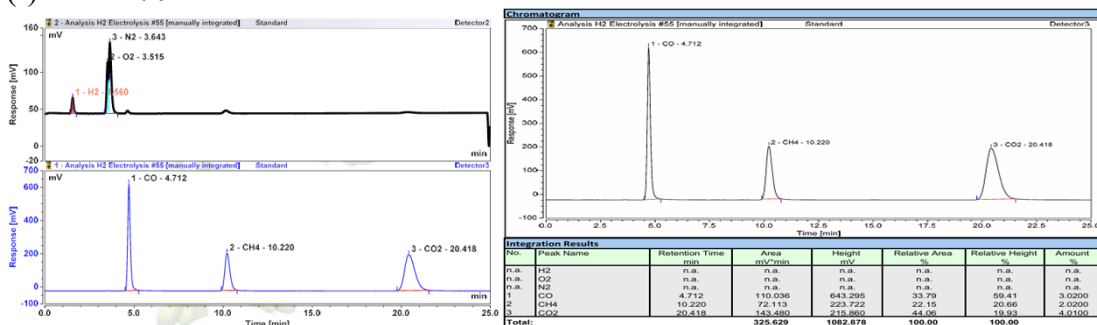

(h) Standard gas

**Figure S20-** GC trace after CPE for 270 minutes of CPE at -2.15 V vs Ag/AgCl with CO<sub>2</sub> and H<sup>+</sup>.

### K<sub>cat</sub>, rate of formation, F.E and TON of Methane

Since in the standard gas the quantity of methane was 503 ppm which attributed to area under the curve as 72.113 mV min. Therefore, 1 ppm = 6.97 ppm/unit. This can be used to further calculate the amount (ppm) of gas produced during the 270 minutes of CPE.

| Min | Area( mV min) | CH <sub>4</sub> (ppm) = area x 6.97 |
|-----|---------------|-------------------------------------|
| 90  | 41.16         | 286.88                              |
| 135 | 49.37         | 344.1                               |
| 180 | 99.98         | 696.86                              |
| 225 | 112.12        | 781.47                              |
| 270 | 131.54        | 916.83                              |

With 0.5 mM of catalyst and 3 ml of headspace we calculated.

$n = \text{ppm}/10^6 \times PV/RT$  ( here, n= mole of CH<sub>4</sub>)

Therefore, Moles of CH<sub>4</sub> = ppm x 1.22x 10<sup>-10</sup>

| Min | Moles of CH <sub>4</sub> = ppm x 1.22x 10 <sup>-10</sup> |
|-----|----------------------------------------------------------|
| 0   | 0                                                        |
| 90  | 3.5 x 10 <sup>-8</sup>                                   |
| 135 | 4.19 x 10 <sup>-8</sup>                                  |
| 180 | 8.50 x 10 <sup>-8</sup>                                  |
| 225 | 9.53 x 10 <sup>-8</sup>                                  |
| 270 | 11.18 x 10 <sup>-8</sup>                                 |

Now , the rate of generation of CH<sub>4</sub> = Δmol of CH<sub>4</sub>/ Δt

Rate = (11.18- 0) x 10<sup>-8</sup> / 16200

= 6.9 x 10<sup>-12</sup> mol/s

Since, we used 0.5 mM of catalyst

$$\text{TON} = \frac{\text{Total moles of CH}_4}{[\text{cat}]}$$

$$= \frac{11.18 \times 10^{-8}}{5 \times 10^{-7}}$$

$$\text{TON} = 0.22$$

$$\text{TOF} = \text{TON} / \text{Time} = 0.22 / 4.5 \text{ hours}$$

$$= 0.05 \text{ h}^{-1}$$

$$\text{Faradaic efficiency} = n N F / Q \times 100\%$$

Q: the charge obtained from the test during CO<sub>2</sub> reduction (C), F: faradaic constant (96485 C/mol), N: the number of electrons required to generate the product, n: the moles of products (mol).

$$\text{F.E}_{\text{CH}_4} = \frac{8 \times 11.18 \times 10^{-8} \times 96485}{24.1} \times 100 = 0.36 \%$$

### **K<sub>cat</sub>, rate of formation , F.E and TON of carbon monoxide**

Since in the standard gas the quantity of methane was 500 ppm which attributed to area under the curve as 110.03 mV min. Therefore, 1 ppm = 4.54 ppm/unit. This can be used to further calculate the amount (ppm) of gas produced during the 270 minutes of CPE.

| Min | Area( mV min) | CH <sub>4</sub> (ppm) = area x 4.54 |
|-----|---------------|-------------------------------------|
| 90  | 30.57         | 138.78                              |
| 135 | 36.57         | 166.02                              |
| 180 | 74.43         | 337.91                              |
| 225 | 92.15         | 418.36                              |
| 270 | 174.04        | 790.14                              |

With 0.5 mM of catalyst and 3 ml of headspace we calculated.

$$n = \text{ppm} / 10^6 \times PV/RT \quad (\text{here, } n = \text{mole of CH}_4)$$

$$\text{Therefore, Moles of CH}_4 = \text{ppm} \times 1.22 \times 10^{-10}$$

| Min | Moles of CH <sub>4</sub> = ppm x 1.22x 10 <sup>-10</sup> |
|-----|----------------------------------------------------------|
| 0   | 0                                                        |
| 90  | 1.69 x 10 <sup>-8</sup>                                  |
| 135 | 2.02 x 10 <sup>-8</sup>                                  |
| 180 | 4.12 x 10 <sup>-8</sup>                                  |
| 225 | 5.1 x 10 <sup>-8</sup>                                   |
| 270 | 9.63 x 10 <sup>-8</sup>                                  |

Now , the rate of generation of CO = Δmol of CH<sub>4</sub>/ Δt

$$\text{Rate} = (9.63 - 0) \times 10^{-8} / 16200$$

$$= 5.9 \times 10^{-12} \text{ mol/s}$$

Since, we used 0.5 mM of catalyst

$$\text{TON} = \frac{\text{Total moles of CO}}{[\text{cat}]}$$

$$= \frac{9.63 \times 10^{-8}}{5 \times 10^{-7}}$$

$$\text{TON} = 0.20$$

$$\text{TOF} = \text{TON} / \text{Time} = 0.2 / 4.5 \text{ hours}$$

$$= 0.045 \text{ h}^{-1}$$

$$\text{Faradaic efficiency} = n N F / Q \times 100\%$$

Q: the charge obtained from the test during CO<sub>2</sub> reduction (C), F: faradaic constant (96485 C/mol), N: the number of electrons required to generate the product, n: the moles of products (mol).

$$F.E_{CO} = \frac{2 \times 9.63 \times 10^{-8} \times 96485}{24.1} \times 100 = 0.08 \%$$

## HPLC

### Detection of oxalic acid by HPLC process:-

*Method for detection and measurement of oxalic acid by HPLC*

Preparation of 10 mmol/l phosphate buffer (pH 2.5) for mobile phase

1. Preparation of 500 ml 10 mmol/l sodium dihydrogenphosphate aqueous solution in 0.005 M TBA Stock solution- 0.78g of sodium dihydrogenphosphate dihydrated was dissolved in 500 ml deionised water followed by addition of 0.848 g of TBA.
2. Preparation of 10 mmol/l phosphate aqueous solution: 0.49g of Phosphoric acid (Purity 85%) was dissolved in 500ml deionized water.
3. pH of stock solution was adjusted to 2.1 by mixing solution 1 with solution 2. Finally the solution was filtered through 0.45-µm EH filters to remove insoluble substances.

Preparation of standard oxalic acid solutions:

0.1 m Mol Oxalic acid solution was prepared by dissolving 1010.1 mg oxalic acid in 10 ml water. Solutions of different concentration were made from this stock solution by dilution with mobile phase solution.

Standard detectable oxalic acid were 1000 µgm/ml, 750 µgm/ml, 500 µgm/ml, 250 µgm/ml, 100 µgm/ml. Each sample was chromatographed for 12 min and the retention time of oxalic acid was found to be ~4.25 min. A linear graph (Fig- S21) was obtained by plotting the peak area vs different oxalic acid concentration.

The Chromatographic condition: - flow rate = 0.3ml/min(0.15ml/min acetonitril, 0.15ml/min 2.00 pH buffer ), oxalic acid was detected at 254 nm, injection volume was 20µl. On plotting the peak area vs. concentration of the standard oxalic acid a liner plot was obtained. From the calibration curve it is possible to quantify the amount of the acids produced in the bulk electrolysis.

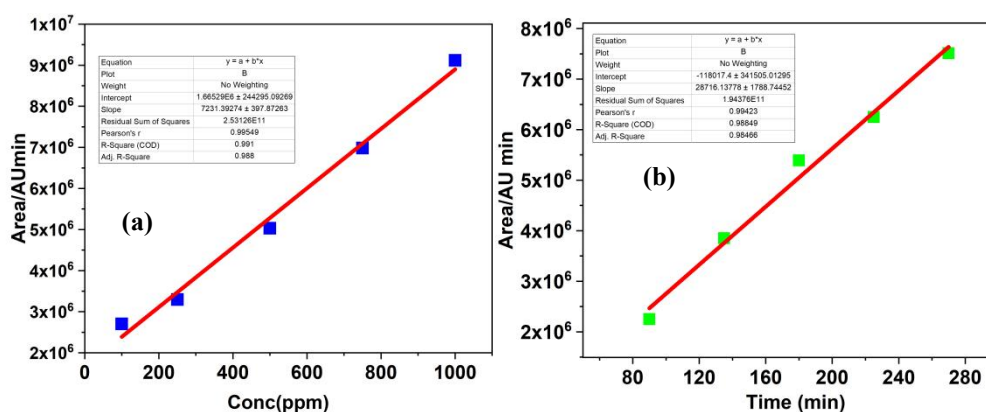



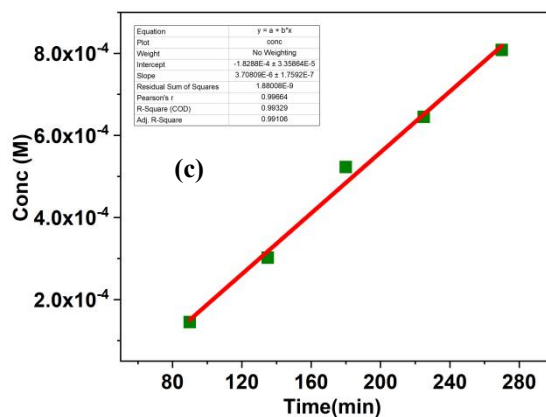

**Figure S 21-** (a) Area vs Concentration graph of standard solution (b) Area vs Time dependent HPLC data observed after every 45 minutes of interval (c) Concentration vs Time graph obtained from the Time dependent HPLC data observed after every 45 minutes of interval and the standard curve.

| Min | ppm    | mmol ( ppm x 0.01/ 90.03) |
|-----|--------|---------------------------|
| 90  | 121.87 | 0.01353                   |
| 135 | 302.95 | 0.03363                   |
| 180 | 516.57 | 0.05738                   |
| 225 | 635.48 | 0.07058                   |
| 270 | 811.21 | 0.09014                   |

Rate of formation of oxalic acid

| Min     | $\Delta$ mmol | Rate (mmol/s)         |
|---------|---------------|-----------------------|
| 90-135  | 0.02          | $7.44 \times 10^{-6}$ |
| 135-180 | 0.023         | $8.80 \times 10^{-6}$ |
| 180-225 | 0.0133        | $4.48 \times 10^{-6}$ |
| 225-270 | 0.0195        | $7.24 \times 10^{-6}$ |

Since using the observed data 811.21 ppm of oxalic acid is formed in 270 minutes and we used 0.5 mM of catalyst.

Since,  $\text{TON} = \text{Moles of product} / \text{Moles of catalyst}$   
 $= 9.014 \times 10^{-3} \text{ moles} / 5 \times 10^{-4} \text{ moles}$

$\text{TON}_{\text{oxalic acid}} = \sim 18$

$\text{TOF} = \text{TON} / \text{Time} = 18 / 4.5 \text{ hours}$   
 $= 4 \text{ h}^{-1}$

Therefore, overall rate of formation of oxalic acid =  $\Delta$ mmol of catalyst/ time  
 $= 0.09013 - 0.01353 \text{ mmol} / 10800 \text{ s}$   
 $= 7.10 \times 10^{-6} \text{ mmol/s} = 7.10 \times 10^{-9} \text{ mol/s}$

**HPLC plots**  
**For Standard**

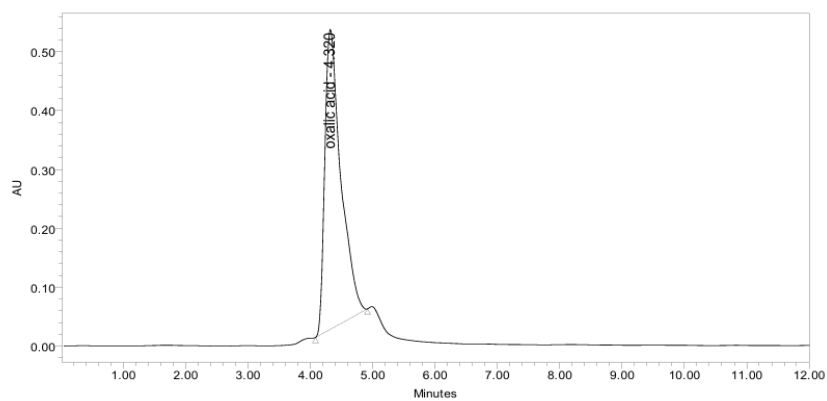

|   | Peak Name   | RT    | Area    | % Area | Height |
|---|-------------|-------|---------|--------|--------|
| 1 | oxalic acid | 4.320 | 9114850 | 100.00 | 510579 |

**1000 ppm**

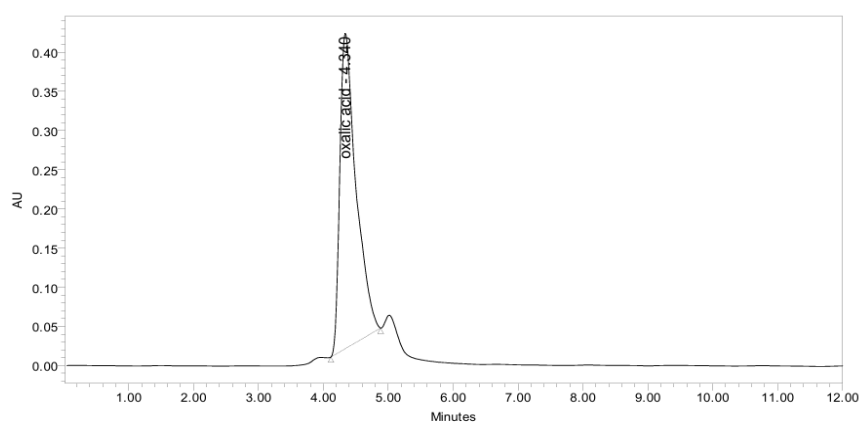

|   | Peak Name   | RT    | Area    | % Area | Height |
|---|-------------|-------|---------|--------|--------|
| 1 | oxalic acid | 4.340 | 6980700 | 100.00 | 403629 |

**750 ppm**

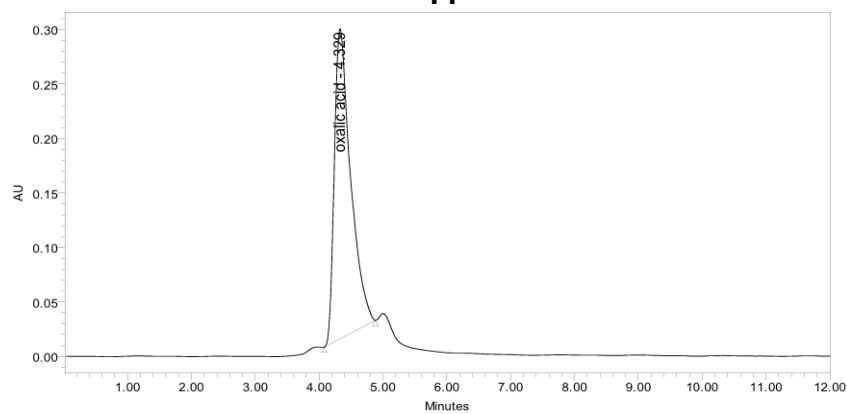

|   | Peak Name   | RT    | Area    | % Area | Height |
|---|-------------|-------|---------|--------|--------|
| 1 | oxalic acid | 4.329 | 5032819 | 100.00 | 285006 |

**500 ppm**

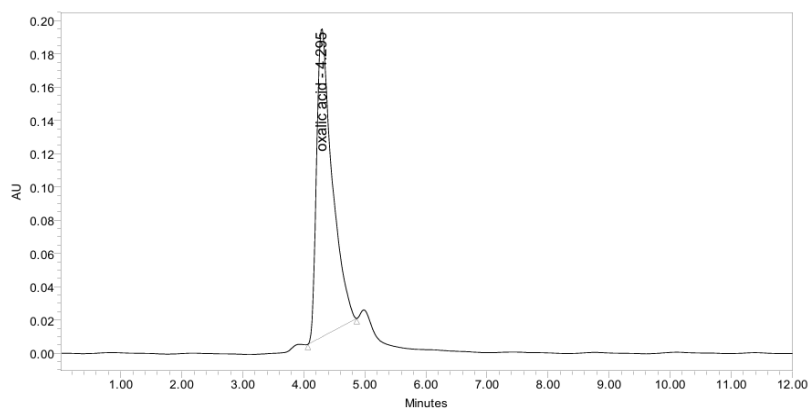

|   | Peak Name   | RT    | Area    | % Area | Height |
|---|-------------|-------|---------|--------|--------|
| 1 | oxalic acid | 4.295 | 3294511 | 100.00 | 185444 |

**250 ppm**

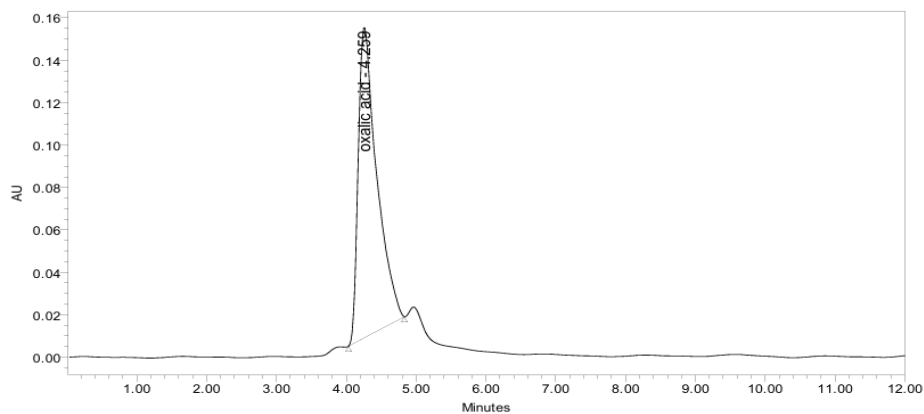

|   | Peak Name   | RT    | Area    | % Area | Height |
|---|-------------|-------|---------|--------|--------|
| 1 | oxalic acid | 4.259 | 2705196 | 100.00 | 146850 |

**100 ppm**

**Figure S 22-** HPLC plot of Standard oxalic solution with 100 ppm to 1000 ppm concentration.

**Time dependent HPLC curve after 45 minutes of interval**

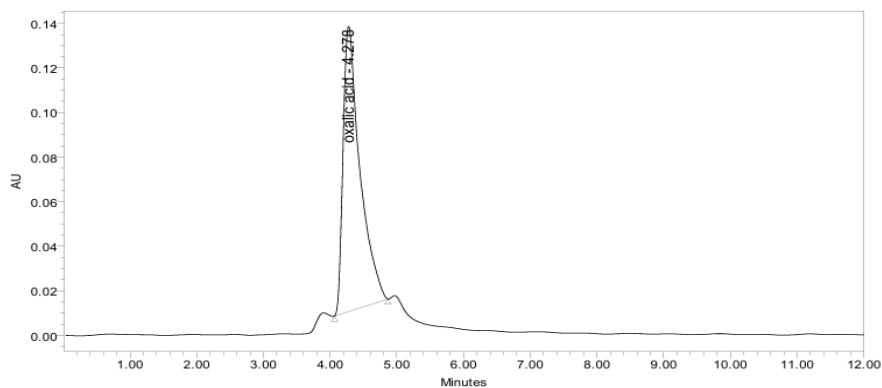

|   | Peak Name   | RT    | Area    | % Area | Height |
|---|-------------|-------|---------|--------|--------|
| 1 | oxalic acid | 4.278 | 2249880 | 100.00 | 128000 |

**90 min**

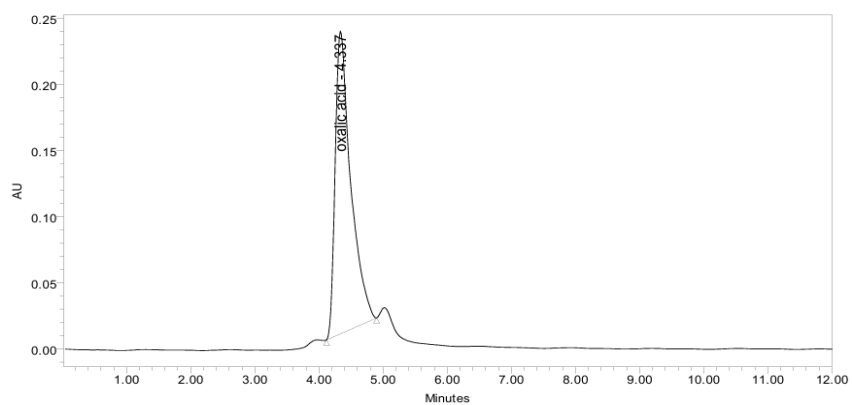

**135 min**

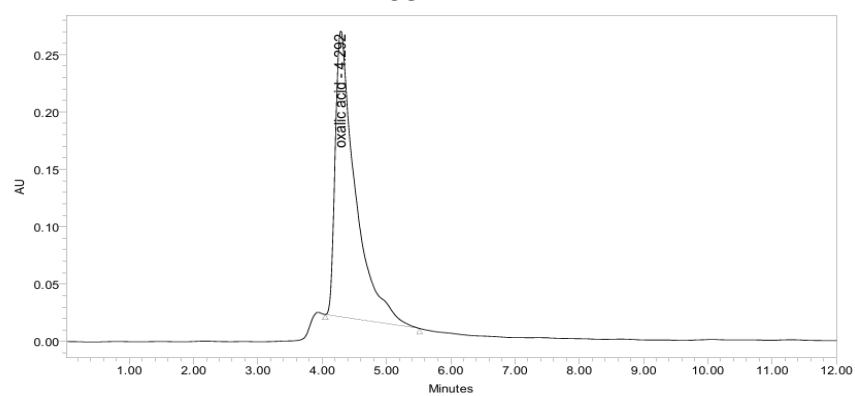

**180 min**

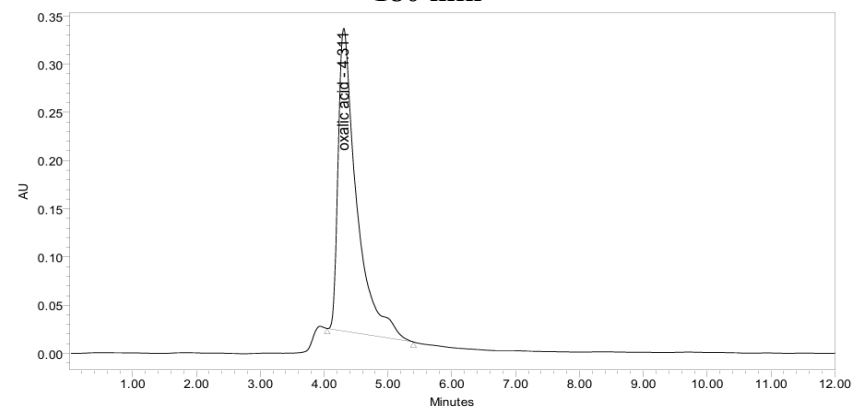

**225 min**

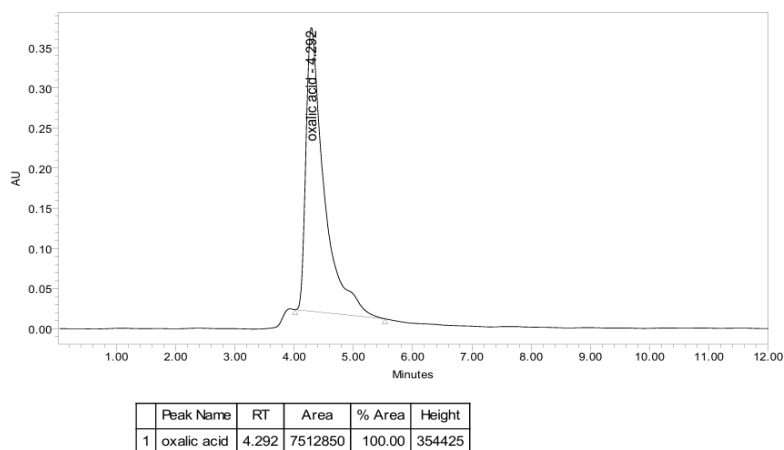

**270 min**

**Figure S 23** - HPLC Plots observed after every 45 minutes of interval of CPE at - 2.15 V after 270 minutes starting from 90 minutes.

$$FE(\%)_{\text{oxalic acid}} = \frac{n \times F \times N_{\text{product}}}{Q_{\text{passed}}} \times 100$$

Where

$n$  = electrons transferred per molecule of product

$F$  = Faraday constant =  $96485 \text{ C mol}^{-1}$

$N_{\text{product}}$  = moles of product formed

$Q_{\text{passed}}$  = total charge passed in coulombs (C)

$Q_{\text{theoretical}} = n \times F \times N_{\text{product}}$

$Q_{\text{theoretical}} = 2 \times 96485 \times 1.1502 \times 10^{-4}$

$Q_{\text{theoretical}} = 22.175 \text{ C}$

$FE(\%) = Q_{\text{passed}} / Q_{\text{theoretical}} \times 100$

$= 22.175 / 24.1 \times 100$

$FE(\%) = 91.99\%$

$F.E = \sim 92\%$

As  $K_{\text{cat}}$ , rate of formation and the TON all the products of electrochemical reduction of  $\text{CO}_2$  is deduced. We can now calculate the selectivity<sup>11</sup> of the products.

$$\text{Selectivity} = n_i / n_t \times 100$$

$n_1$  is the target product ( in moles) generated during the CPE and  $n_t$  is the total product ( in moles) generated during the CPE.

$$\begin{aligned}\text{Total mole of products} &= 9.014 \times 10^{-3} \text{ moles (oxalic acid)} + 11.18 \times 10^{-8} \text{ (methane)} + \\ &9.63 \times 10^{-8} \text{ (carbon monoxide)} \\ &= 9.014 + 0.0001118 + 0.0000963 \\ &= 9.0142081 \times 10^{-3} \text{ mol}\end{aligned}$$

Now,

$$\begin{aligned}\text{Selectivity}_{\text{CH}_4} &= n_1 / n_t \times 100 \\ &= 11.18 \times 10^{-8} \text{ mol} / 9.0142081 \times 10^{-3} \text{ mol} \times 100 \\ &= 1.2408 \times 10^{-5} \%\end{aligned}$$

$$\begin{aligned}\text{Selectivity}_{\text{CO}} &= n_1 / n_t \times 100 \\ &= 9.63 \times 10^{-8} \text{ mol} / 9.0142081 \times 10^{-3} \text{ mol} \times 100 \\ &= 1.0681 \times 10^{-5} \%\end{aligned}$$

$$\begin{aligned}\text{Selectivity}_{\text{(oxalic acid)}} &= n_1 / n_t \times 100 \\ &= 9.014 \times 10^{-3} \text{ moles} / 9.0142081 \times 10^{-3} \text{ mol} \times 100 \\ &= \sim 99.9997\%\end{aligned}$$

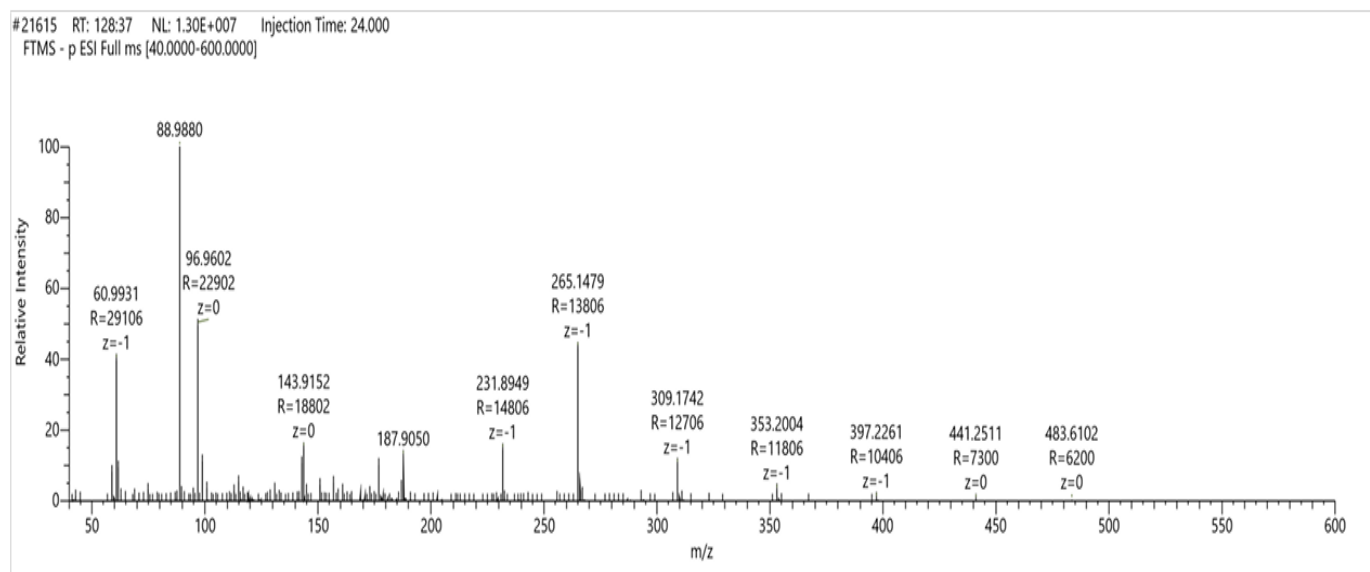

**Figure S24-** (a) HRMS spectra of catalytic solution after 270 minutes of CPE at -2.15 V using glassy carbon electrode in water with CO<sub>2</sub> and perchloric acid.

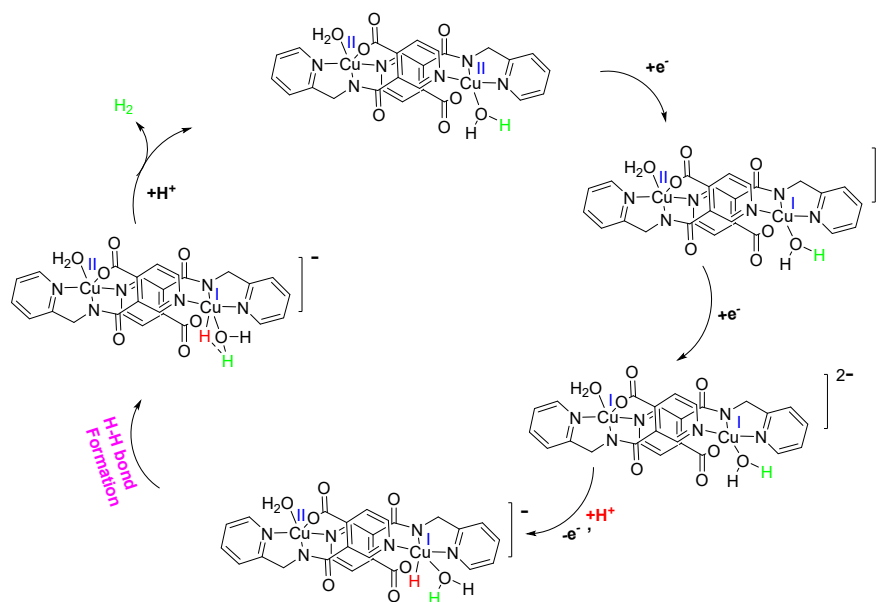

**Figure S25 (a)-** Plausible mechanism for Proton reduction by Complex 1.

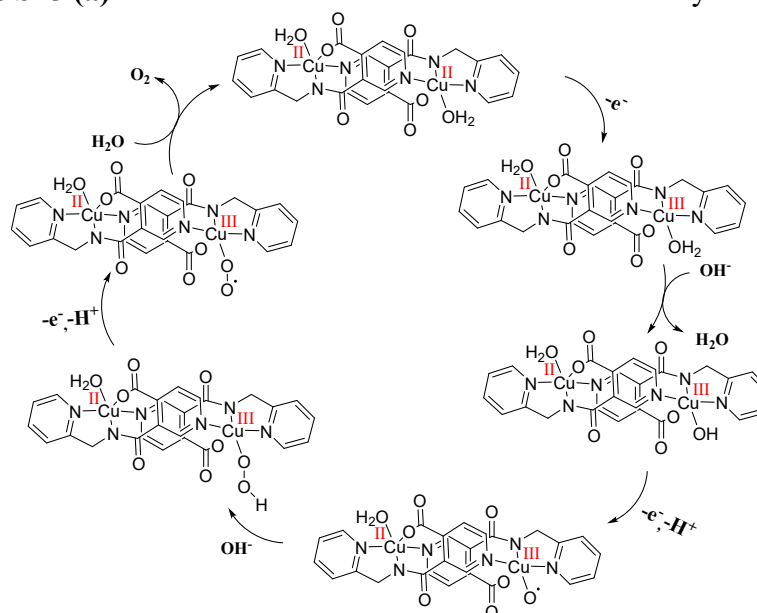

**Figure S25 (b)-** Plausible mechanism for Oxygen evolution reaction by Complex 1.

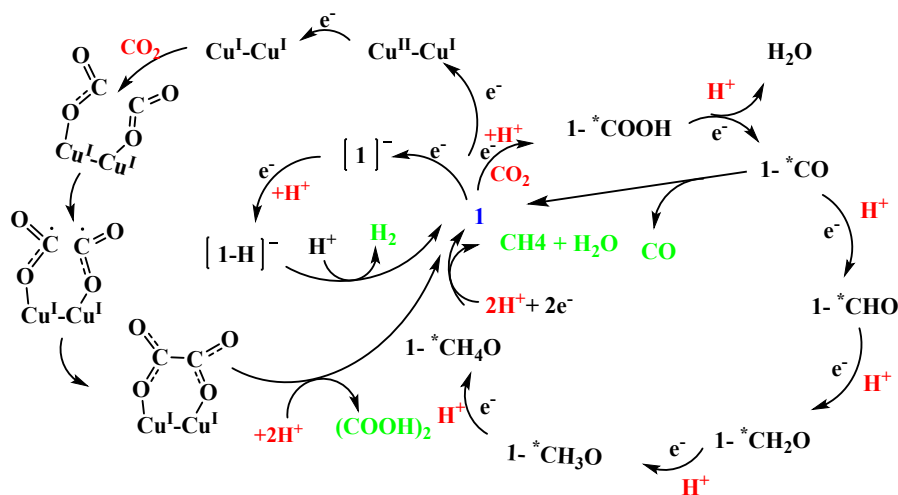

**Figure S25 (c)**- Plausible mechanism for the CO<sub>2</sub>RR to (COOH)<sub>2</sub> with competitive reaction generating H<sub>2</sub>, CO and CH<sub>4</sub>.

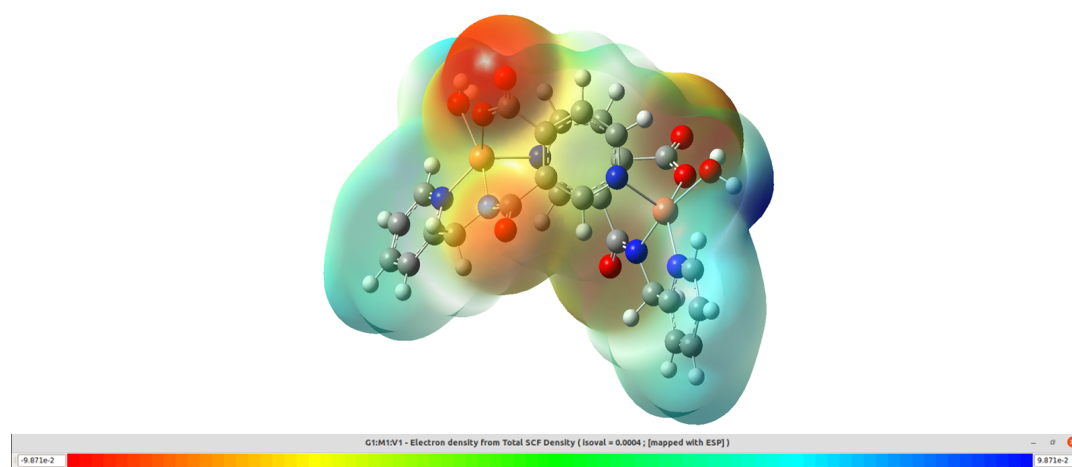

**Figure S 26** - Electrostatic Potential Plots of complex 1

### Reference

1. P. J. Griffin, M. J. Dake, A. D. Remolina, L. Olshansky, **Dalton Trans.**, 2023,**52**, 8376-8383.
2. T. L. Yusuf, S. D. Oladipo, S. Zamisa, H. M. Kumalo, I. A. Lawal, M. M. Lawal, N. Mabuba, **ACS Omega**, 2021,**6**,13704–13718.
3. S. Rai, S. K. Padhi. *Electrochimica Acta*, 2020 ,**364**, 137277
4. B. Rudshiteyn, K. J. Fisher, H. M. C. Lant, K. Yang, R. B. Q. Mercado, G. W. Brudvig, R. H. Crabtree, V. S. Batista, *ACS Catal.*, 2018, **8**, 7952–7960.
5. S. Nestke, E. Ronge, I. Siewert, **Dalton Trans.**, 2018, **47**, 10737-10741.
6. T. Zhang, C. Wang, S. Liu, Jin-Liang Wang, W. Lin, *J. Am. Chem. Soc.* 2014,**136**,273–281.
7. S. Khan, S. Sengupta, M. A. Khan, M. P. Sk, N. Ch. Jana, S. Naskar, *Inorg. Chem.* 2024, **63**, 1888–1897.
8. S. M. Barnett, K. I. Goldberg, J. M. Mayer, *Nat. Chem.*, 2012, **4**, 498.
9. A. M. Abudayyeh, M. S. Bennington, J. Hamonnet, A. T. Marshall, S. Brooker, *Dalton Trans.*, 2024, **53**, 6207.
10. H. Lei, H. Fang, Y. Han, W. Lai, X. Fu, R. Cao, *ACS Catalysis*, **5**, 5145–5153.
11. Z. Zhang, Y. Yang, J. Wang, Xu. Jing, C. Duan, *Inorg. Chem. Front.*, 2025, Advance Article.
12. S.K. S. Akhter, D. Srivastava, A. Mishra, N. Patra, P. Kumar, S. K. Padhi. *Chem. Eur. J.* 2024, **30**, e202403321.
13. S. Sengupta, S. Khan, B. N. Mongal, W. Lewis, M. Fleck, S. K. Chattopadhyay, S. Naskar, *Polyhedron*. 2020, **191** ,114798.

### Cartesian Coordinate for Complex 1



**E(UB3LYP)= -5215.150574 Hartree**

|    |          |          |          |
|----|----------|----------|----------|
| C  | -0.60756 | -2.98214 | 0.34536  |
| C  | -1.63877 | -1.95985 | 0.46634  |
| C  | -2.96385 | -2.40419 | 0.51933  |
| C  | -3.23253 | -3.75683 | 0.67419  |
| C  | -0.99695 | -4.29364 | 0.40554  |
| H  | -3.76825 | -1.7011  | 0.46025  |
| H  | -4.24115 | -4.09983 | 0.77406  |
| H  | -0.27585 | -5.06498 | 0.23253  |
| N  | -2.22348 | -4.61766 | 0.7167   |
| C  | 0.93002  | -2.87162 | 0.16978  |
| C  | -1.50926 | -0.40752 | 0.5432   |
| O  | 1.54459  | -3.78708 | -0.43677 |
| O  | -2.51869 | 0.2862   | 0.25442  |
| O  | -0.44106 | 0.20374  | 0.90422  |
| N  | 1.60566  | -1.88175 | 0.66272  |
| C  | 4.27894  | 2.0244   | 0.5745   |
| C  | 3.2756   | 2.53511  | 1.4125   |
| C  | 2.22404  | 1.69862  | 1.82721  |
| C  | 3.16901  | -0.10061 | 0.6743   |
| C  | 4.22423  | 0.6792   | 0.19611  |
| H  | 5.07396  | 2.65347  | 0.23229  |
| H  | 3.3092   | 3.5558   | 1.7318   |
| H  | 1.44989  | 2.08119  | 2.45904  |
| H  | 4.97422  | 0.25705  | -0.43967 |
| C  | 3.01515  | -1.59686 | 0.39466  |
| N  | 2.19315  | 0.42135  | 1.42208  |
| Cu | 0.77591  | -0.74621 | 1.82502  |
| O  | 1.19732  | -0.55163 | 3.59518  |
| H  | 0.42011  | -0.7281  | 4.13037  |
| H  | 3.62741  | -2.16006 | 1.06763  |
| H  | 3.29208  | -1.84071 | -0.60969 |
| H  | 1.49934  | 0.3454   | 3.75556  |

|    |          |          |          |
|----|----------|----------|----------|
| C  | -1.56946 | -4.06435 | 3.01864  |
| C  | -2.79772 | -3.51111 | 3.04063  |
| C  | -2.9449  | -2.13195 | 3.01926  |
| C  | -1.82165 | -1.34987 | 2.68546  |
| C  | -0.47639 | -3.29621 | 2.50008  |
| H  | -3.88979 | -1.67579 | 3.2291   |
| H  | -1.91288 | -0.28398 | 2.66359  |
| H  | 0.44813  | -3.76794 | 2.24011  |
| N  | -0.62759 | -1.92233 | 2.38015  |
| C  | -1.50319 | -5.52295 | 3.58813  |
| C  | -3.96814 | -4.51976 | 3.02249  |
| O  | -1.63443 | -5.73517 | 4.82153  |
| O  | -5.09623 | -4.17414 | 3.46016  |
| O  | -3.79964 | -5.76806 | 2.51159  |
| N  | -1.36934 | -6.51927 | 2.77325  |
| C  | 1.13015  | -8.77779 | -0.40826 |
| C  | 0.26924  | -8.10842 | -1.292   |
| C  | -0.81358 | -7.36687 | -0.78524 |
| C  | -0.20021 | -7.93609 | 1.40103  |
| C  | 0.8927   | -8.68814 | 0.96665  |
| H  | 1.95578  | -9.34723 | -0.78104 |
| H  | 0.43592  | -8.16204 | -2.3476  |
| H  | -1.47175 | -6.85346 | -1.45469 |
| H  | 1.53248  | -9.18231 | 1.6676   |
| C  | -0.56886 | -7.71686 | 2.86481  |
| N  | -1.01982 | -7.30554 | 0.53832  |
| Cu | -2.45827 | -6.33534 | 1.29599  |
| H  | 0.30307  | -7.58819 | 3.47153  |
| H  | -1.14021 | -8.52764 | 3.26613  |
| O  | -3.594   | -7.33073 | 0.26248  |
| H  | -4.39798 | -7.51259 | 0.75455  |
| H  | -3.16916 | -8.15858 | 0.02633  |
